# Supplementary material for: Immunotherapy and Cannabis: A Harmful Drug Interaction or Reefer Madness?
Source: MDPI journal article supplement (doi:10.3390/cancers16071245), 2024-03-22
Supplement: s1 [file s1]

# Summary of Table 1

- Appropriate analysis of Table 1 is crucial for any RCT or retrospective study. Unfortunately, this “correction” should be viewed with substantial skepticism.
- Of the 22 p values that were listed, 16 could **not** be replicated using the N provided and using the statistics listed in the methods. 6 of the 22 p values could also not be verified using the N reported and three different nonparametric statistics (chi-square, Fisher’s, and chi-square with Yates correction)
- The authors appear to have inappropriately reported the p value for another statistic than was listed in their methods. As the Yates correction is typically only run with N per cell of  $< 5^1$  (see also BMJ guidance), the preponderance of the information in this “correction” is factually incorrect. This statistic was misapplied in many situations where the N was sufficiently large.
- It also shows exceedingly poor attention to detail that percentages appear to be calculated incorrectly three times and there were 19 rounding errors on this “corrected” table.

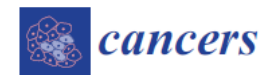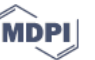

## Correction

**Correction: Bar-Sela et al. Cannabis Consumption Used by Cancer Patients during Immunotherapy Correlates with Poor Clinical Outcome. *Cancers* 2020, 12, 2447**

Gil Bar-Sela <sup>1,2,\*</sup>, Idan Cohen <sup>1</sup> , Salvatore Campisi-Pinto <sup>3</sup>, Gil M. Lewitus <sup>3</sup> , Lanuel Oz-Ari <sup>2</sup>, Ayellet Jehassi <sup>4</sup>, Avivit Peer <sup>5</sup>, Ilit Turgeman <sup>5</sup> , Olga Vernicova <sup>1</sup>, Paula Berman <sup>3</sup> , Mira Wollner <sup>5</sup>, Mor Moskovitz <sup>5</sup> and David Meiri <sup>3,\*</sup>

1. See Wikipedia or most standard statistics textbooks

#### 4.4 Statistical analysis (from Bar-Sala et al. *Cancers* 2020; 12:2447)

A series of  $\chi^2$  tests or Fisher's exact tests (when the assumptions of the parametric  $\chi^2$  test were not met) and nonparametric Mann–Whitney U tests were conducted to analyze the differences between patients' characteristics in both groups. Time to tumor progression (TTP) and overall survival (OS) was estimated using the Kaplan-Meier survival curve by group, and the log-rank test was computed to differentiate the survival curves between groups. Hazard ratios and the corresponding 95% CIs based on a Cox proportional hazards regression model were provided for multivariate analyses. We computed 2-tailed  $p$ -values, where  $p < 0.05$  was considered a statistically significant result. Statistical analyses were performed using the SAS software package version 9.4 (SAS Institute, Cary, NC, USA).

Note that the methods section does **not** mention running chi-square with Yates correction. According to standard convention, this would be completed when the N for a cell was  $< 5$ .

[https://en.wikipedia.org/wiki/Yates%27s\\_correction\\_for\\_continuity](https://en.wikipedia.org/wiki/Yates%27s_correction_for_continuity)

I attempted to replicate the nonparametric statistics using:

<https://www.graphpad.com/quickcalcs/contingency2/>

**Bold**  $p$ -values on the next page (right 3 columns) correspond with those reported in the “corrected” table

# BMJ's guidance on small N

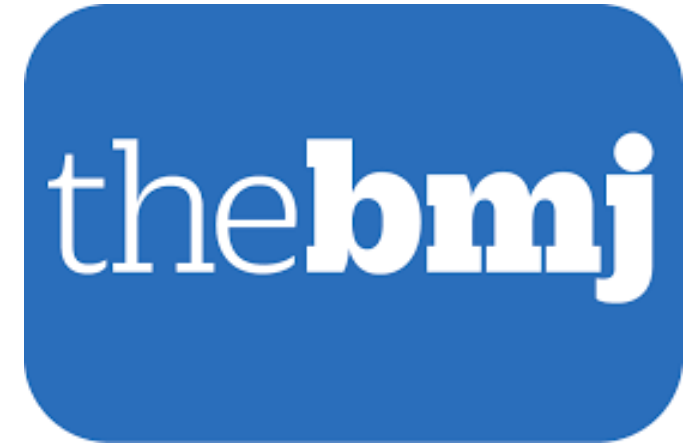

## Small numbers

When the numbers in a 2 x 2 contingency table are small, the  $\chi^2$  approximation becomes poor. The following recommendations may be regarded as a sound guide. (2) In fourfold tables a  $\chi^2$  test is inappropriate if the total of the table is less than 20, or if the total lies between 20 and 40 and the smallest expected (not observed) value is less than 5; in contingency tables with more than one degree of freedom it is inappropriate if more than about one fifth of the cells have expected values less than 5 or any cell an expected value of less than 1. An alternative to the  $\chi^2$  test for fourfold tables is known as Fisher's Exact test and is described in Chapter 9

Here is a description from the *British Medical Journal* (BMJ) on when the N expected per cell is so small as to be concerning. They note a total of all 4 cells should be between 20 and 40. This study has a total N of  $68 + 34 = 102$  so alternatives to chi-square would generally not be warranted. My reading of the above is that when more than one-fifth of cells (i.e. two of four) have expected (not observed) values of  $< 5$ , then Fisher's should be run. The corrected table contains observed (instead of expected) values but the 2x2 analyses for the data in K, M & O (label on 1<sup>st</sup> column of page 5) would be situation where Fisher's would be warranted.

<https://www.bmj.com/about-bmj/resources-readers/publications/statistics-square-one/8-chi-squared-tests>

# < 10 guidance for use of Yates

When the values in a fourfold table are fairly small a “correction for continuity” known as the “Yates’ correction” may be applied (3). Although there is no precise rule defining the circumstances in which to use Yates’ correction, a common practice is to incorporate it into  $\chi^2$  calculations on tables with a total of under 100 or with any cell containing a value less than 10. The  $\chi^2$  test on a fourfold table is then modified as follows:

As will be seen, it does not appear that Fisher’s was ever reported. Yates correction would be applied when the value of a single cell is between 0 and 9. This would apply to 2x2 tables from D, F, G, I, J, K, M, N, O, P, S, U, V.

Note that, even if the authors did run Yates, the circumstances of when they ran a chi-square and when they ran Yates should have been clearly but briefly described in the methods. Unfortunately, they were not.

Table 1. Demographics and medical conditions. (page 1)

| Characteristics             |                                                 | Cannabis Non-Users<br>N = 68 |           | Cannabis Users<br>N = 34 |           | p-Value           | Chi-sq | Fishers | Chi-sq Yates |
|-----------------------------|-------------------------------------------------|------------------------------|-----------|--------------------------|-----------|-------------------|--------|---------|--------------|
| Age in years median (range) |                                                 | 69 (18–92)                   |           | 66 (37–85)               |           | Why no t p-value? |        |         |              |
| A                           | Gender—N (%)                                    |                              |           |                          |           |                   |        |         |              |
|                             | Female                                          | 22 (32.4)                    | 32.4      | 10 (29.5)                | 29.4      | 0.9399            | .7628  | .8240   | .9399        |
|                             | Male                                            | 46 (67.6)                    | 67.6      | 24 (70.5)                | 70.6      |                   |        |         |              |
| B                           | Performance Status                              |                              |           |                          |           |                   |        |         |              |
|                             | Eastern Cooperative Oncology Group (ECOG)—N (%) |                              |           |                          |           |                   |        |         |              |
|                             | 1 ≤                                             | 55 (80.8)                    | 80.9      | 24 (70.5)                | 70.6      | 0.3568            | .2409  | .3152   | .3568        |
|                             |                                                 | ≥2                           | 13 (19.1) | 19.1                     | 10 (29.4) | 29.4              |        |         |              |
| C                           | Chronic diseases per patient—N (%)              |                              |           |                          |           |                   | .4908  | .5136   | .6398        |
| D                           | 0                                               | 22 (32.3)                    | 32.4      | 13 (22.0)                | 38.2      | 0.7124            | .7376  | .8062   | .9332        |
| E                           | 1                                               | 16 (23.5)                    | 23.5      | 7 (20.5)                 | 20.6      | 0.9332            | .7774  | .8341   | .9437        |
| E                           | 2 or more                                       | 30 (44.1)                    | 44.1      | 14 (41.1)                | 41.2      | 0.9437            |        |         |              |
| F                           | Background diseases—N (%)                       |                              |           |                          |           |                   | .1802  | .2162   | .2762        |
| G                           | Chronic heart disease                           | 18 (26.4)                    | 26.5      | 5 (14.7)                 | 14.7      | 0.2762            | .4022  | .4606   | .5576        |
| H                           | Diabetes                                        | 17 (25.0)                    | 25.0      | 6 (17.6)                 | 17.6      | 0.5576            | .2611  | .2971   | .3612        |
| I                           | High blood pressure                             | 34 (50.0)                    | 50.0      | 13 (34.1)                | 38.2      | 0.3612            | .5145  | .7463   | .7445        |
| J                           | Chronic obstructive pulmonary disease (COPD)    | 9 (13.2)                     | 13.2      | 3 (8.8)                  | 8.8       | 1                 | .1436  | .1737   | .2174        |
| K                           | Hyperlipidemia                                  | 23 (33.8)                    | 33.8      | 7 (20.5)                 | 20.6      | 0.2491            | .3125  | .5512   | .8007        |
| K                           | Other                                           | 2 (2.9)                      | 2.9       | 0 (0.0)                  | 0.0       | 1                 |        |         |              |
| L                           | Type of malignancy—N (%)                        |                              |           |                          |           |                   | .6723  | .8327   | .8325        |
| M                           | Non-small cell lung cancer                      | 37 (54.4)                    | 54.4      | 20 (58.8)                | 58.8      | 0.8325            | .2985  | .3750   | .4140        |
| N                           | Melanoma                                        | 25 (36.7)                    | 36.8      | 9 (26.4)                 | 26.5      | 0.414             | 1.000  | 1.000   | 1.000        |
| O                           | Renal cell carcinoma                            | 4 (5.8)                      | 5.9       | 2 (5.8)                  | 5.9       | 1                 | .1946  | .3300   | .4175        |
| O                           | Other                                           | 2 (2.9)                      | 2.9       | 3 (8.8)                  | 8.8       | 1                 |        |         |              |
| P                           | Main site of metastasis—N (%)                   |                              |           |                          |           |                   | .4806  | .5976   | .6593        |
| Q                           | Brain                                           | 12 (17.6)                    | 17.6      | 8 (13.2)                 | 23.5      | 0.6593            | .3155  | .3914   | .4303        |
| R                           | Lungs                                           | 39 (57.3)                    | 57.4      | 23 (67.6)                | 67.6      | 0.4303            | .1374  | .1468   | .2157        |
| R                           | Liver                                           | 13 (19.1)                    | 19.1      | 11 (32.3)                | 32.4      | 0.2157            |        |         |              |

Green = correctly reported %, Red = rounding error, Yellow highlights = percentage reporting error

Bold matches reported p-value  
red = incorrect test, green = correct test

## Summary of Page 1 of Table 1

Of 18 provided p values, only 1 could be verified using the statistics specified in the methods section.

Of the 18 provided p values, 12 had p values that could be replicated but only by using a **different statistic** than was described in the methods section (chi-square with Yates correction).

Of the 18 provided p values, 5 could not be verified using either chi-sq or Fisher's (i.e. the statistics in the methods) or with chi-square with Yates correction.

There were 3 percentages whose calculations were incorrectly reported by at least 4.0% (Min = 4.1%, Max = 13.2%)

There were 14 errors of rounding (difference always = 0.1%).

A minor omission is that it would be more conventional to list a p-value (e.g. t-test) for the group comparison for age.



## Summary of Page 2 of Table 2

Table 1 tests for the equivalence between groups which is a core component of any observational study.

Importantly, the results section does **not** note that the two groups were statistically different at baseline regarding whether immunotherapy was first or second line. This is a major oversight that substantially impacts the interpretation of this study.

Of the 4 statistics on this page, only 1 was “correct”.

2 statistics could not be verified using the statistics specified in the methods. However, the p-value could be obtained using a different statistic (chi-square with Yates correction) than was in their methods for 3 p values.

1 statistic could not be verified.

Although minor, of the 10 percentages that were listed, 5 had rounding errors.



graphpad.com/quickcalcs/...

1. Select category 2. Choose calculator 3. Enter data 4. View results

## Analyze a 2x2 contingency table

Contingency tables are used to analyze counts of subjects to determine if there is association between two factors. This calculator is for 2x2 contingency tables that separate each subject into one of four categories based on two factors, each with two possibilities. Simply label the rows and columns, then type in the counts for each cell to test the relationship between the two factors. Learn more about contingency tables (along with when to use each test) in the description below the calculator.

**Enter your data**  
Enter the labels and number of subjects actually observed. Don't enter proportions, percentages or means.

|           | Can - | Can + |
|-----------|-------|-------|
| 1st line  | 31    | 8     |
| 2nd+ line | 37    | 26    |

**Which test**

☐ Fisher's exact test

☒ Chi-square

☐ Chi-square with Yates' correction

**P value Tails**

☒ Two-tailed (recommended)

☐ One-tailed

**Calculate** **Clear The Form**

graphpad.com/quickcalcs/...

AMP Gmail Im Speedtest Canvas2 CHR-Datasets

GraphPad by Dotmatics Prism Customers Resources Support Price

1. Select category 2. Choose calculator 3. Enter data

## Analyze a 2x2 contingency table

|           | Can - | Can + | Total |
|-----------|-------|-------|-------|
| 1st line  | 31    | 8     | 39    |
| 2nd+ line | 37    | 26    | 63    |
| Total     | 68    | 34    | 102   |

**Chi-square without Yates correction**  
Chi squared equals 4.670 with 1 degrees of freedom.  
The two-tailed P value equals 0.0307  
The association between rows (groups) and columns (outcomes) is considered to be statistically significant.

Here are the screen captures of the immunotherapy as first vs second line analysis. The "Correction" reports the p-value as .05178 (i.e. non-significant). GraphPad show a p-value of .0317 (i.e. significant).

# A. “corrected” chi-sq or Fishers $p = .9399$

1. Select category 2. Choose calculator 3. Enter data 4. View results

## Analyze a 2x2 contingency table

Contingency tables are used to analyze counts of subjects to determine if there is association between two factors. This calculator is for 2x2 contingency tables that separate each subject into one of four categories based on two factors, each with two possibilities. Simply label the rows and columns, then type in the counts for each cell to test the relationship between the two factors. Learn more about contingency tables (along with when to use each test) in the description below the calculator.

Enter your data

Enter the labels and number of subjects actually observed. Don't enter proportions, percentages or means.

|   | C NU | CU |
|---|------|----|
| F | 22   | 10 |
| M | 46   | 24 |

Which test

☐ Fisher's exact test

☒ Chi-square

☐ Chi-square with Yates' correction

P value Tails

☒ Two-tailed (recommended)

☐ One-tailed

1. Select category 2. Choose calculator 3. Enter data 4. View results

## Analyze a 2x2 contingency table

|       | C NU | CU | Total |
|-------|------|----|-------|
| F     | 22   | 10 | 32    |
| M     | 46   | 24 | 70    |
| Total | 68   | 34 | 102   |

Chi-square without Yates correction

Chi squared equals 0.091 with 1 degrees of freedom.

The two-tailed P value equals 0.7628

The association between rows (groups) and columns (outcomes) is considered to be not statistically significant.

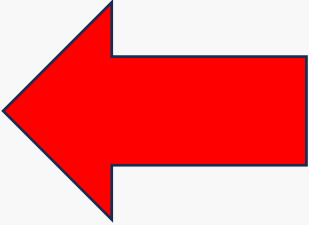

# A. “corrected” chi-sq or Fishers $p = .9399$

1. Select category 2. Choose calculator 3. Enter data 4. View results

## Analyze a 2x2 contingency table

Contingency tables are used to analyze counts of subjects to determine if there is association between two factors. This calculator is for 2x2 contingency tables that separate each subject into one of four categories based on two factors, each with two possibilities. Simply label the rows and columns, then type in the counts for each cell to test the relationship between the two factors. Learn more about contingency tables (along with when to use each test) in the description below the calculator.

Enter your data

Enter the labels and number of subjects actually observed. Don't enter proportions, percentages or means.

|   | C NU | CU |
|---|------|----|
| F | 22   | 10 |
| M | 46   | 24 |

Which test

☒ Fisher's exact test

☐ Chi-square

☐ Chi-square with Yates' correction

P value Tails

☒ Two-tailed (recommended)

☐ One-tailed

[Calculate](#) [Clear The Form](#)

1. Select category 2. Choose calculator 3. Enter data 4. View results

## Analyze a 2x2 contingency table

|       | C NU | CU | Total |
|-------|------|----|-------|
| F     | 22   | 10 | 32    |
| M     | 46   | 24 | 70    |
| Total | 68   | 34 | 102   |

Fisher's exact test

The two-tailed P value equals 0.8240

The association between rows (groups) and columns (outcomes) is considered to be not statistically significant.

The “corrected” p value could not be verified for gender.

# A. “corrected” chi-sq or Fishers $p = .9399$

## Analyze a 2x2 contingency table

Contingency tables are used to analyze counts of subjects to determine if there is association between two factors. This calculator is for 2x2 contingency tables that separate each subject into one of four categories based on two factors, each with two possibilities. Simply label the rows and columns, then type in the counts for each cell to test the relationship between the two factors. Learn more about contingency tables (along with when to use each test) in the description below the calculator.

### Enter your data

Enter the labels and number of subjects actually observed. Don't enter proportions, percentages or means.

|   |      |    |
|---|------|----|
|   | C NU | CU |
| F | 22   | 10 |
| M | 46   | 24 |

### Which test

- ☐ Fisher's exact test  
☐ Chi-square  
☒ Chi-square with Yates' correction

### P value Tails

- ☒ Two-tailed (recommended)  
☐ One-tailed

Calculate

Clear The Form

graphpad.com/quickc...

Gmail Im Speedtest Canvas2 CHR-Datasets

GraphPad Prism Customers Resources Support Pricing Cart Sign

1. Select category 2. Choose calculator 3. Enter data 4. View results

## Analyze a 2x2 contingency table

|       |      |    |       |
|-------|------|----|-------|
|       | C NU | CU | Total |
| F     | 22   | 10 | 32    |
| M     | 46   | 24 | 70    |
| Total | 68   | 34 | 102   |

Chi-square with Yates correction

Chi squared equals 0.006 with 1 degrees of freedom.

The two-tailed P value equals 0.9399

The association between rows (groups) and columns (outcomes) is considered to be not statistically significant.

Note large (> 10) cell size

The “corrected” p value for gender **does** correspond with that of another (arguably inappropriate, not in methods) test.

## B. “corrected” chi-sq or Fisher’s $p = .3568$

graphpad.com/q...

AMP Gmail Im Speedtest Canvas2

by Dotmatics

1. Select category 2. Choose calculator 3. Enter data 4. View results

### Analyze a 2x2 contingency table

Contingency tables are used to analyze counts of subjects to determine if there is association between two factors. The calculator is for 2x2 contingency tables that separate each subject into one of four categories based on two factors with two possibilities. Simply label the rows and columns, then type in the counts for each cell to test the relationship between the two factors. Learn more about contingency tables (along with when to use each test) in the description of the calculator.

Enter your data

Enter the labels and number of subjects actually observed. Don't enter proportions, percentages or means.

|    | C NU | CU |
|----|------|----|
| 1  | 55   | 24 |
| 2+ | 13   | 10 |

Which test

☐ Fisher's exact test

☒ Chi-square

☐ Chi-square with Yates' correction

P value Tails

☒ Two-tailed (recommended)

☐ One-tailed

Calculate Clear The Form

## Analyze a 2x2 contingency table

|       | C NU | CU | Total |
|-------|------|----|-------|
| 1     | 55   | 24 | 79    |
| 2+    | 13   | 10 | 23    |
| Total | 68   | 34 | 102   |

### Chi-square without Yates correction

Chi squared equals 1.375 with 1 degrees of freedom

The two-tailed P value equals 0.2409

The association between rows (groups) and columns (outcomes) is considered to be not statistically significant.

## B. “corrected” chi-sq or Fishers $p = .3568$

### Analyze a 2x2 contingency table

Contingency tables are used to analyze counts of subjects to determine if there is association between two factors. The calculator is for 2x2 contingency tables that separate each subject into one of four categories based on two factors with two possibilities. Simply label the rows and columns, then type in the counts for each cell to test the relationship between the two factors. Learn more about contingency tables (along with when to use each test) in the description of the calculator.

#### Enter your data

Enter the labels and number of subjects actually observed. Don't enter proportions, percentages or means.

|    | C NU | CU |
|----|------|----|
| 1  | 55   | 24 |
| 2+ | 13   | 10 |

#### Which test

- ☒ Fisher's exact test  
☐ Chi-square  
☐ Chi-square with Yates' correction

#### P value Tails

- ☒ Two-tailed (recommended)  
☐ One-tailed

Calculate

Clear The Form

GraphPad  
by Dotmatics

1. Select category 2. Choose calculator 3. Enter data 4. View results

### Analyze a 2x2 contingency table

|       | C NU | CU | Total |
|-------|------|----|-------|
| 1     | 55   | 24 | 79    |
| 2+    | 13   | 10 | 23    |
| Total | 68   | 34 | 102   |

**Fisher's exact test**  
The two-tailed P value equals 0.3152  
The association between rows (groups) and columns (outcomes) is considered to be not statistically significant.

The reported ECOG p values could not be verified with chi-square or Fisher's. The cell size  $\geq 5$  so Yates would not be warranted according to the BMJ guidance.

## B. “corrected” chi-sq or Fishers $p = .3568$

### Analyze a 2x2 contingency table

Contingency tables are used to analyze counts of subjects to determine if there is a significant association between two categorical variables. The calculator is for 2x2 contingency tables that separate each subject into one of two categories. Simply label the rows and columns, then type in the counts between the two factors. Learn more about contingency tables (along with the calculator).

#### Enter your data

Enter the labels and number of subjects actually observed. Don't enter percentages.

|    | C NU | CU |
|----|------|----|
| 1  | 55   | 24 |
| 2+ | 13   | 10 |

#### Which test

- ☐ Fisher's exact test
- ☐ Chi-square
- ☒ Chi-square with Yates' correction

#### P value Tails

- ☒ Two-tailed (recommended)
- ☐ One-tailed

Calculate

Clear The Form

GraphPad  
by Dotmatics

1. Select category 2. Choose calculator 3. Enter data 4. Results

### Analyze a 2x2 contingency table

|       | C NU | CU | Total |
|-------|------|----|-------|
| 1     | 55   | 24 | 79    |
| 2+    | 13   | 10 | 23    |
| Total | 68   | 34 | 102   |

Chi-square with Yates correction

Chi squared equals 0.849 with 1 degrees of freedom.

The two-tailed P value equals 0.3568

The association between rows (groups) and columns (outcomes) is considered to be not statistically significant.

The p-value can be repeated with the **wrong** statistic.

Note that the N per cell is  $\geq 10$  so chi-square with Yates is **not** the appropriate statistic to run here.

# C. “corrected” chi-sq or Fishers $p = .7124$

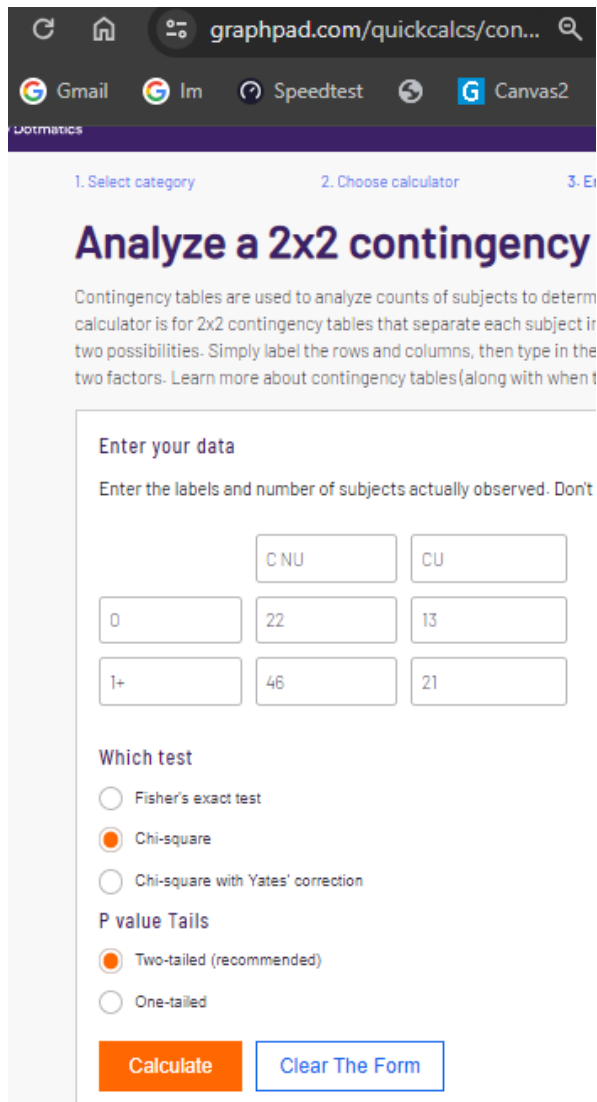

graphpad.com/quickcalcs/con...

1. Select category 2. Choose calculator 3. Enter data

## Analyze a 2x2 contingency

Contingency tables are used to analyze counts of subjects to determine the relationship between two possibilities. Simply label the rows and columns, then type in the counts for each combination. Learn more about contingency tables (along with when to use them).

Enter your data

Enter the labels and number of subjects actually observed. Don't

|    | C NU | CU |
|----|------|----|
| 0  | 22   | 13 |
| 1+ | 46   | 21 |

Which test

☐ Fisher's exact test

☒ Chi-square

☐ Chi-square with Yates' correction

P value Tails

☒ Two-tailed (recommended)

☐ One-tailed

[Calculate](#) [Clear The Form](#)

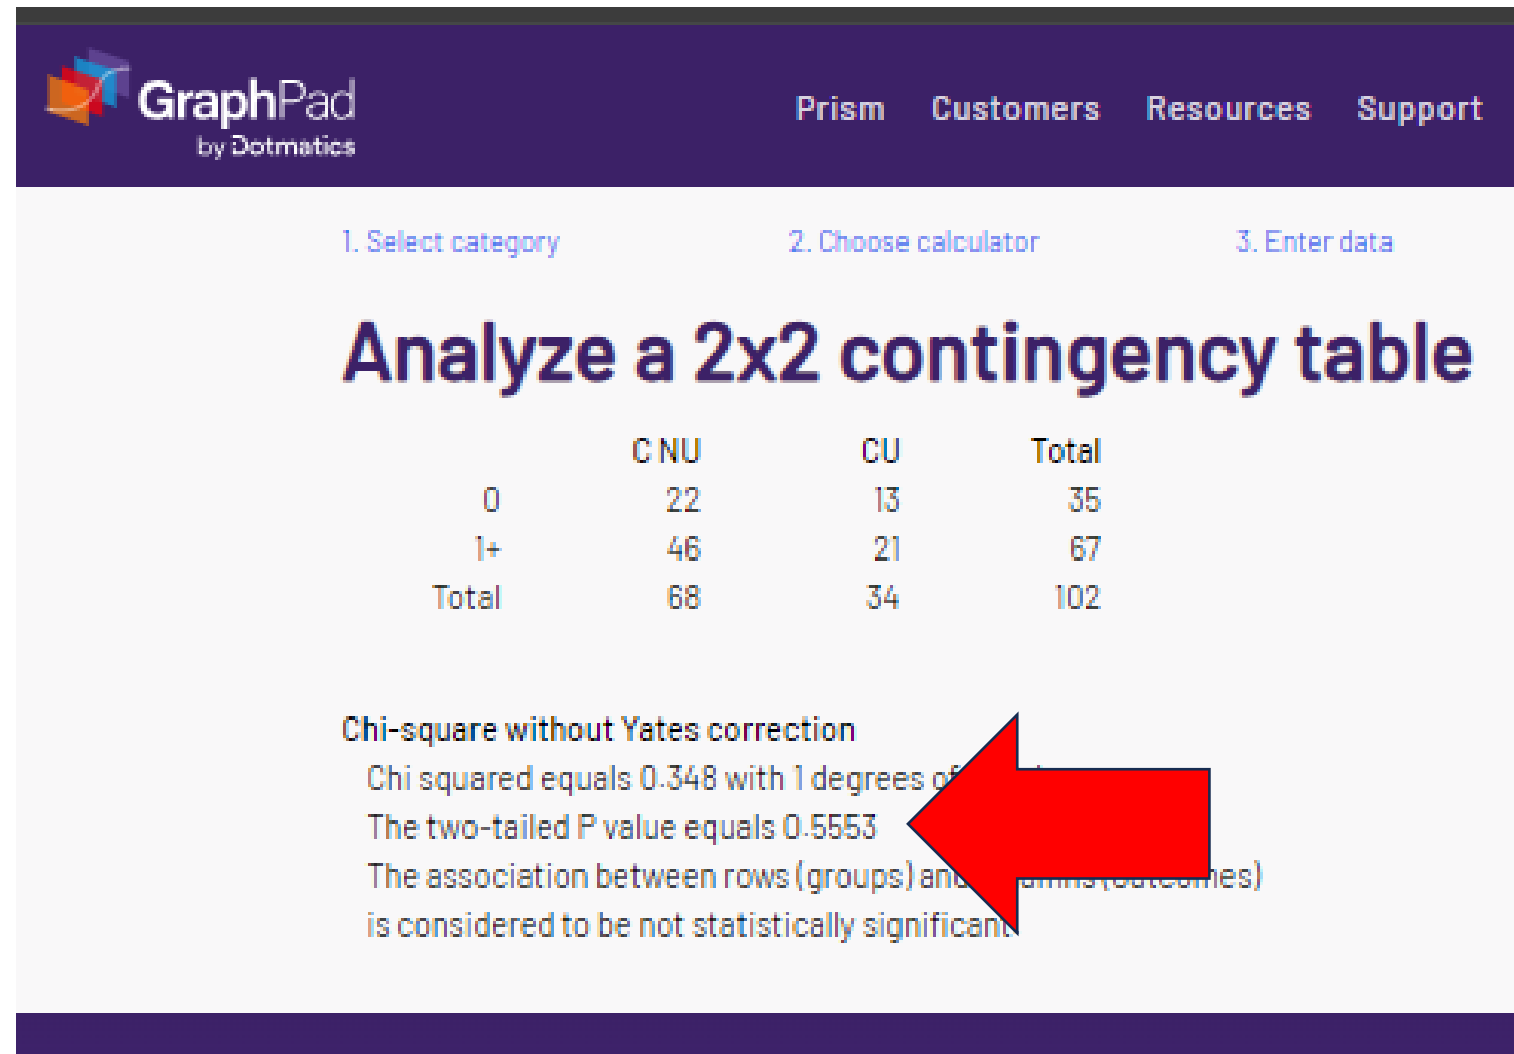

1. Select category 2. Choose calculator 3. Enter data

## Analyze a 2x2 contingency table

|       | C NU | CU | Total |
|-------|------|----|-------|
| 0     | 22   | 13 | 35    |
| 1+    | 46   | 21 | 67    |
| Total | 68   | 34 | 102   |

Chi-square without Yates correction

Chi squared equals 0.348 with 1 degrees of freedom

The two-tailed P value equals 0.5553

The association between rows (groups) and columns (outcomes) is considered to be not statistically significant.

The 1+ is calculated as sum of 1 and 2+ groups



# C. “corrected” chi-sq or Fishers $p = .7124$

## Analyze a 2x2 contingency table

Contingency tables are used to analyze counts of subjects to determine if there is a significant association between two variables. This calculator is for 2x2 contingency tables that separate each subject into two possibilities. Simply label the rows and columns, then type in the counts for each combination of the two factors. Learn more about contingency tables (along with when to use them).

### Enter your data

Enter the labels and number of subjects actually observed. Don't enter zeros.

|    | C NU | CU |
|----|------|----|
| 0  | 22   | 13 |
| 1+ | 46   | 21 |

### Which test

- ☒ Fisher's exact test  
☐ Chi-square  
☐ Chi-square with Yates' correction

### P value Tails

- ☒ Two-tailed (recommended)  
☐ One-tailed

Calculate

Clear The Form

Statistics

1. Select category

2. Choose calculator

3. Enter data

## Analyze a 2x2 contingency table

|       | C NU | CU | Total |
|-------|------|----|-------|
| 0     | 22   | 13 | 35    |
| 1+    | 46   | 21 | 67    |
| Total | 68   | 34 | 102   |

### Fisher's exact test

The two-tailed P value equals 0.6590

The association between rows (groups) and columns (outcomes) is considered to be not statistically significant.

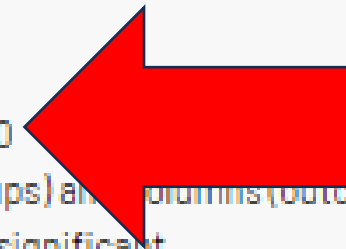

The Chronic Diseases / patient (0 vs 1+) could not be verified with chi-square or Fisher's.

# C. “corrected” chi-sq or Fishers $p = .7124$

## Analyze a 2x2 contingency

Contingency tables are used to analyze counts of subjects to determine if there is a significant association between two variables. Simply label the rows and columns, then type in the counts for each combination of the two factors. Learn more about contingency tables (along with when to use them).

Enter your data

Enter the labels and number of subjects actually observed. Don't

|    | C NU | CU |
|----|------|----|
| 0  | 22   | 13 |
| 1+ | 46   | 21 |

Which test

☐ Fisher's exact test

☐ Chi-square

☒ Chi-square with Yates' correction

P value Tails

☒ Two-tailed (recommended)

☐ One-tailed

[Calculate](#) [Clear The Form](#)

graphpad.com/quickcalc...

AMP Gmail Im Speedtest Canvas2

GraphPad by Dotmatics Prism Customers Resources

1. Select category 2. Choose calculator 3. Enter data

## Analyze a 2x2 contingency table

|       | C NU | CU | Total |
|-------|------|----|-------|
| 0     | 22   | 13 | 35    |
| 1+    | 46   | 21 | 67    |
| Total | 68   | 34 | 102   |

Chi-square with Yates correction

Chi squared equals 0.136 with 1 degrees of freedom.

The two-tailed P value equals 0.7124

The association between rows (groups) and columns (outcomes) is considered to be not statistically significant.

The Chronic Diseases / patient (0 vs 1+) does correspond with that of the wrong statistic.

Note that N per cell > 20 so Yates is **inappropriate** and should **not** be reported here.

# D. “corrected” chi-sq or Fishers $p = .9332$

1. Select category 2. Choose calculator 3. Enter data

## Analyze a 2x2 contingency

Contingency tables are used to analyze counts of subjects to determine if there is a relationship between two factors. This calculator is for 2x2 contingency tables that separate each factor, each with two possibilities. Simply label the rows and columns, and enter the counts. Learn more about contingency tables and the relationship between the two factors. Learn more about contingency tables and the relationship between the two factors.

Enter your data

Enter the labels and number of subjects actually observed.

|       | C NU | CU |
|-------|------|----|
| 1     | 16   | 7  |
| not 1 | 52   | 27 |

Which test

☐ Fisher's exact test

☒ Chi-square

☐ Chi-square with Yates' correction

P value Tails

☒ Two-tailed (recommended)

☐ One-tailed

Calculate Clear The Form

‘Not 1’ calculated as sum of 0 and 2+

1. Select category 2. Choose calculator 3. Enter data

## Analyze a 2x2 contingency

|       | C NU | CU | Total |
|-------|------|----|-------|
| 1     | 16   | 7  | 23    |
| not 1 | 52   | 27 | 79    |
| Total | 68   | 34 | 102   |

Chi-square without Yates correction

Chi squared equals 0.112 with 1 degrees of freedom

The two-tailed P value equals 0.7376

The association between rows (groups) and columns (outcomes) is considered to be not statistically significant.

## D. “corrected” chi-sq or Fishers $p = .9332$

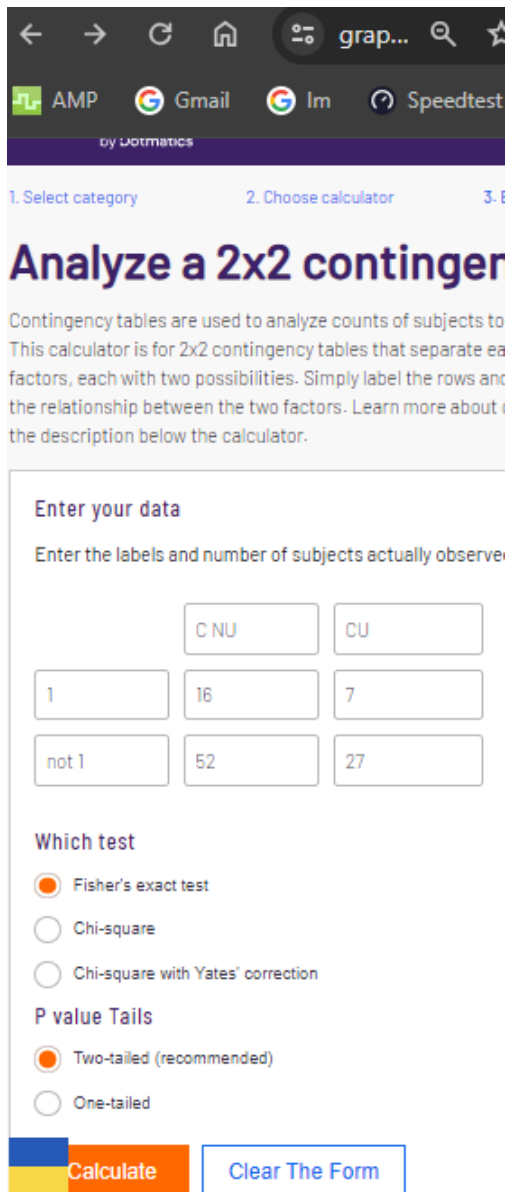

1. Select category 2. Choose calculator 3. Enter data

### Analyze a 2x2 contingency

Contingency tables are used to analyze counts of subjects to... This calculator is for 2x2 contingency tables that separate ea... factors, each with two possibilities. Simply label the rows and... the relationship between the two factors. Learn more about... the description below the calculator.

Enter your data

Enter the labels and number of subjects actually observe

|       | C NU | CU |
|-------|------|----|
| 1     | 16   | 7  |
| not 1 | 52   | 27 |

Which test

☒ Fisher's exact test

☐ Chi-square

☐ Chi-square with Yates' correction

P value Tails

☒ Two-tailed (recommended)

☐ One-tailed

Calculate Clear The Form

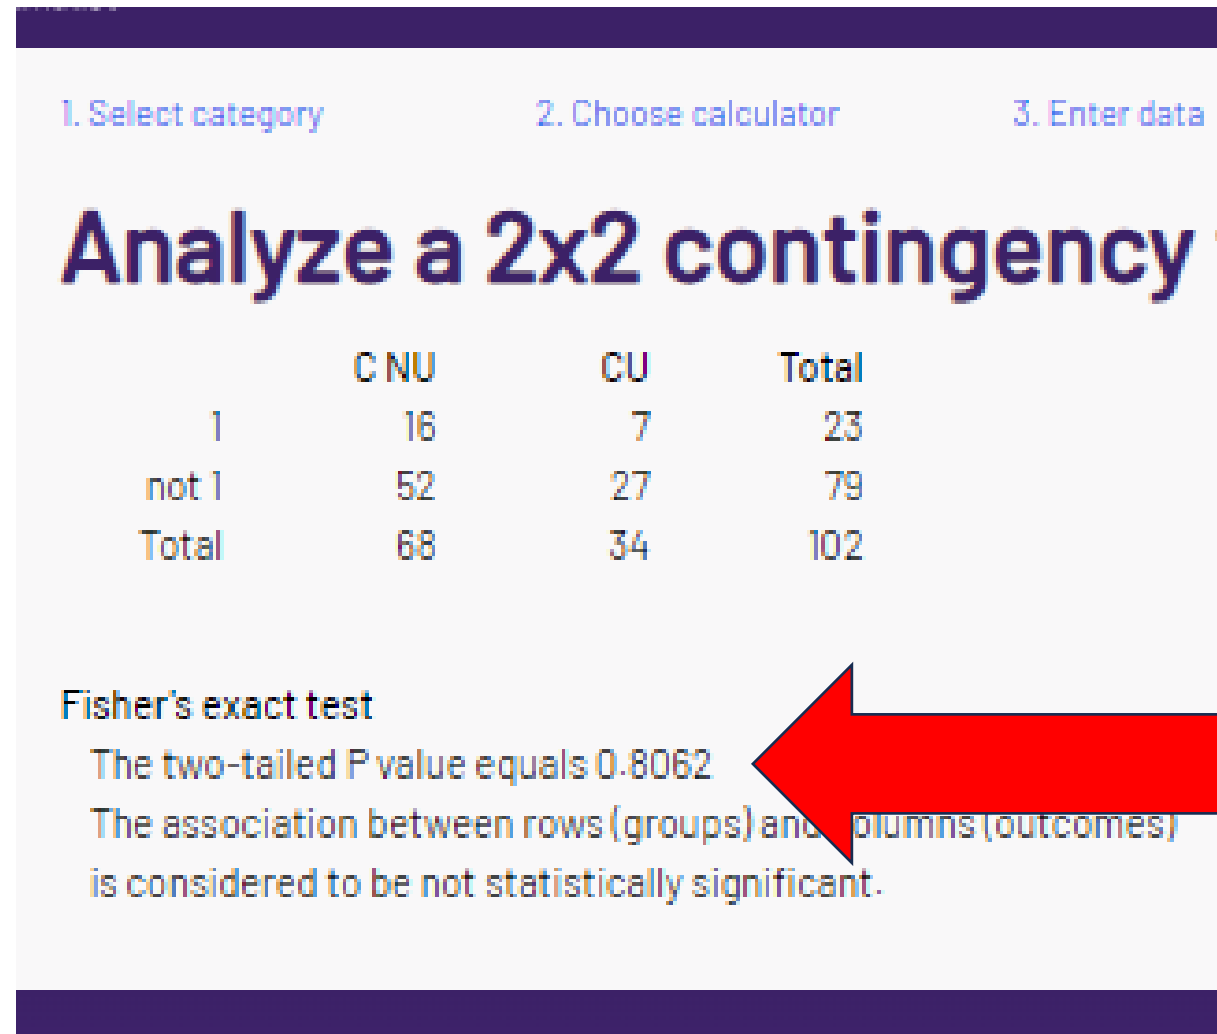

1. Select category 2. Choose calculator 3. Enter data

### Analyze a 2x2 contingency

|       | C NU | CU | Total |
|-------|------|----|-------|
| 1     | 16   | 7  | 23    |
| not 1 | 52   | 27 | 79    |
| Total | 68   | 34 | 102   |

Fisher's exact test

The two-tailed P value equals 0.8062

The association between rows (groups) and columns (outcomes) is considered to be not statistically significant.

P value for chronic diseases = 1 **not verified** with chi-square or Fisher's.

## D. “corrected” chi-sq or Fishers $p = .9332$

### Analyze a 2x2 contingency

Contingency tables are used to analyze counts of subjects to factors. This calculator is for 2x2 contingency tables that set on two factors, each with two possibilities. Simply label the cell to test the relationship between the two factors. Learn more (use each test) in the description below the calculator.

#### Enter your data

Enter the labels and number of subjects actually observed means.

|       |      |    |
|-------|------|----|
|       | C NU | CU |
| 1     | 16   | 7  |
| not 1 | 52   | 27 |

#### Which test

- ☐ Fisher's exact test  
☐ Chi-square  
☒ Chi-square with Yates' correction

#### P value Tails

- ☒ Two-tailed (recommended)  
☐ One-tailed

### Analyze a 2x2 contingency table

|       | C NU | CU | Total |
|-------|------|----|-------|
| 1     | 16   | 7  | 23    |
| not 1 | 52   | 27 | 79    |
| Total | 68   | 34 | 102   |

#### Chi-square with Yates correction

Chi squared equals 0.007 with 1 degrees of freedom.

The two-tailed P value equals 0.9332

The association between rows (groups) and columns (outcomes) is considered to be not statistically significant.

P value for chronic diseases = 1 can be reproduced but only using an **inappropriate statistic** (not in methods).

Note that N per cell is  $> 5$  so Yates is the wrong statistic according to the Wikipedia criteria. It could be applied according to BMJ guidance (although, again, only if specified in the methods).

E. “corrected” chi-sq or Fishers  $p = .9437$

graphpa...

AMP Gmail Im Speedtest

by Dotmatics

1. Select category 2. Choose calculator 3.

## Analyze a 2x2 contingency

Contingency tables are used to analyze counts of subjects to c  
calculator is for 2x2 contingency tables that separate each sut  
with two possibilities. Simply label the rows and columns, then  
between the two factors. Learn more about contingency table  
below the calculator.

Enter your data

Enter the labels and number of subjects actually observed.

|       | C NU | CU |
|-------|------|----|
| 0 & 1 | 38   | 20 |
| 2+    | 30   | 14 |

Which test

☐ Fisher's exact test

☒ Chi-square

☐ Chi-square with Yates' correction

P value Tails

☒ Two-tailed (recommended)

☐ One-tailed

Calculate Clear The Form

GraphPad  
by Dotmatics

Select category 2. Choose calculator 3. Enter data

## Analyze a 2x2 contingency table

|       | C NU | CU | Total |
|-------|------|----|-------|
| 0 & 1 | 38   | 20 | 58    |
| 2+    | 30   | 14 | 44    |
| Total | 68   | 34 | 102   |

Chi-square without Yates correction

Chi squared equals 0.080 with 1 degrees

The two-tailed P value equals 0.7774

The association between rows (groups) and columns (outcomes)  
is considered to be not statistically significant.

# E. “corrected” chi-sq or Fishers $p = .9437$

## Analyze a 2x2 contingency

Contingency tables are used to analyze counts of subjects to determine if there is a significant association between two factors. The calculator is for 2x2 contingency tables that separate each subject into two categories. Simply label the rows and columns, then type in the counts. The results of the chi-square test and Fisher's exact test are shown below the calculator. Learn more about contingency tables (contingency tables) below the calculator.

### Enter your data

Enter the labels and number of subjects actually observed. Do not use spaces in labels.

|       | C NU | CU |
|-------|------|----|
| 0 & 1 | 38   | 20 |
| 2+    | 30   | 14 |

### Which test

- ☒ Fisher's exact test  
☐ Chi-square  
☐ Chi-square with Yates' correction

### P value Tails

- ☒ Two-tailed (recommended)  
☐ One-tailed

Calculate

Clear The Form

 **GraphPad**  
by Dotmatics

1. Select category

2. Choose calculator

3. Enter data

## Analyze a 2x2 contingency table

|       | C NU | CU | Total |
|-------|------|----|-------|
| 0 & 1 | 38   | 20 | 58    |
| 2+    | 30   | 14 | 44    |
| Total | 68   | 34 | 102   |

**Fisher's exact test**  
The two-tailed P value equals 0.8341  
The association between rows (groups) and columns (outcomes) is considered to be not statistically significant.

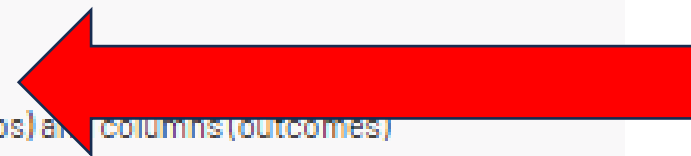

For chronic diseases 2+, the “corrected” statistics (chi-sq or Fisher's) could **not** be verified.

# E. “corrected” chi-sq or Fishers $p = .9437$

1. Select category 2. Choose calculator

## Analyze a 2x2 contingency table

Contingency tables are used to analyze counts of subjects with two possibilities. Simply label the rows and columns between the two factors. Learn more about contingency tables below the calculator.

Enter your data

Enter the labels and number of subjects actual

|       | C NU | CU |
|-------|------|----|
| 0 & 1 | 38   | 20 |
| 2+    | 30   | 14 |

Which test

☐ Fisher's exact test

☐ Chi-square

☒ Chi-square with Yates' correction

P value Tails

☒ Two-tailed (recommended)

☐ One-tailed

graphpad.com...

AMP Gmail Im Speedtest

GraphPad by Dotmatics

1. Select category 2. Choose calculator 3. Enter data

## Analyze a 2x2 contingency table

|       | C NU | CU | Total |
|-------|------|----|-------|
| 0 & 1 | 38   | 20 | 58    |
| 2+    | 30   | 14 | 44    |
| Total | 68   | 34 | 102   |

Chi-square with Yates correction

Chi squared equals 0.005 with 1 degrees of freedom

The two-tailed P value equals 0.9437

The association between rows (groups) and columns (outcomes) is considered to be not statistically significant.

For chronic diseases 2+, the p value could be reproduced but only with an Inappropriate statistic.

Note large N.

As the N per cell is large (>13), Yates is an inappropriate statistic and should not be reported.



# F. “corrected” chi-sq or Fishers $p = .2762$

## Analyze a 2x2 contingency

Contingency tables are used to analyze counts of subjects to determine if there is a significant association between two variables. This calculator is for 2x2 contingency tables that separate each subject into two categories. Simply label the rows and columns, then type in the counts for each combination of the two factors. Learn more about contingency tables (a link is provided below the calculator).

### Enter your data

Enter the labels and number of subjects actually observed. Do not use commas as thousands separators.

|      | C NU | CU |
|------|------|----|
| CHD+ | 18   | 5  |
| 2+   | 50   | 29 |

### Which test

- ☐ Fisher's exact test  
☒ Chi-square  
☐ Chi-square with Yates' correction

### P value Tails

- ☒ Two-tailed (recommended)  
☐ One-tailed

Calculate

Clear The Form

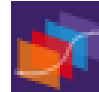

GraphPad  
by Dotmatics

1. Select category

2. Choose calculator

3. Enter data

## Analyze a 2x2 contingency table

|       | C NU | CU | Total |
|-------|------|----|-------|
| CHD+  | 18   | 5  | 23    |
| 2+    | 50   | 29 | 79    |
| Total | 68   | 34 | 102   |

### Chi-square without Yates correction

Chi squared equals 1.796 with 1 degrees of freedom

The two-tailed P value equals 0.1802

The association between rows (groups) and columns (outcomes) is considered to be not statistically significant.

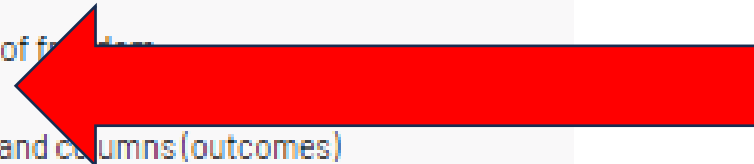

F. “corrected” chi-sq or Fishers  $p = .2762$

1. Select category 2. Choose calculator 3. Enter data

### Analyze a 2x2 contingency table

Contingency tables are used to analyze counts of subjects to determine the relationship between two factors. The calculator is for 2x2 contingency tables that separate each subject with two possibilities. Simply label the rows and columns, then type in the counts between the two factors. Learn more about contingency tables (all below the calculator).

**Enter your data**  
Enter the labels and number of subjects actually observed. Do not use spaces in labels.

|      | C NU | CU |
|------|------|----|
| CHD+ | 18   | 5  |
| 2+   | 50   | 29 |

**Which test**

☒ Fisher's exact test

☐ Chi-square

☐ Chi-square with Yates' correction

**P value Tails**

☒ Two-tailed (recommended)

☐ One-tailed

**Calculate** **Clear The Form**

1. Select category 2. Choose calculator 3. Enter data

### Analyze a 2x2 contingency table

Contingency tables are used to analyze counts of subjects to determine the relationship between two factors. The calculator is for 2x2 contingency tables that separate each subject with two possibilities. Simply label the rows and columns, then type in the counts between the two factors. Learn more about contingency tables (all below the calculator).

**Enter your data**  
Enter the labels and number of subjects actually observed. Do not use spaces in labels.

|       | C NU | CU | Total |
|-------|------|----|-------|
| CHD+  | 18   | 5  | 23    |
| 2+    | 50   | 29 | 79    |
| Total | 68   | 34 | 102   |

**Fisher's exact test**  
The two-tailed P value equals 0.2162  
The association between rows (groups) and columns (factors) is considered to be not statistically significant.

The reported “corrected” p value could not be verified with chi-square or Fisher’s.

# F. “corrected” chi-sq or Fishers $p = .2762$

## Analyze a 2x2 contingency

Contingency tables are used to analyze counts of subjects to determine if there is a significant association between two categorical variables. A calculator is for 2x2 contingency tables that separate each subject into two possibilities. Simply label the rows and columns, then type in the counts for each combination of the two factors. Learn more about contingency tables (along with when to use them).

### Enter your data

Enter the labels and number of subjects actually observed. Don't enter totals.

|      |      |    |
|------|------|----|
|      | C NU | CU |
| CHD+ | 18   | 5  |
| 2+   | 50   | 29 |

### Which test

- ☐ Fisher's exact test
- ☐ Chi-square
- ☒ Chi-square with Yates' correction

### P value Tails

- ☒ Two-tailed (recommended)
- ☐ One-tailed

Calculate

Clear The Form

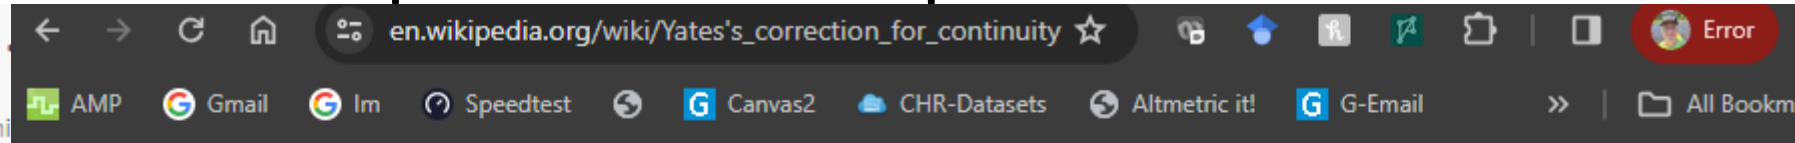

Yates's chi-squared test by subtracting 0.5 from the difference between each observed value and its expected value in a  $2 \times 2$  contingency table.<sup>[1]</sup> This reduces the chi-squared value obtained and thus increases its p-value.

The effect of Yates's correction is to prevent overestimation of statistical significance for small data. This formula is chiefly used when at least one cell of the table has an expected count smaller than 5. Unfortunately, Yates's correction may tend to overcorrect. This can result in an overly conservative result that fails to reject the null hypothesis when it should (a type II error). So it is suggested that Yates's correction is unnecessary even with quite low sample sizes,<sup>[2]</sup> such as:

According to Wikipedia (above), an  $N < 5$  might warrant Yates correction. However, as the smallest cell observed = 5, it would not be warranted here according to the Wiki convention. It could be used (when in methods) according to the BMJ Guidance.

## Analyze a 2x2 contingency table

|       | C NU | CU | Total |
|-------|------|----|-------|
| CHD+  | 18   | 5  | 23    |
| 2+    | 50   | 29 | 79    |
| Total | 68   | 34 | 102   |

### Chi-square with Yates correction

Chi squared equals 1.186 with 1 degrees of freedom.

The two-tailed P value equals 0.2762

The association between rows (groups) and

is considered to be not statistically significant.

P value is reproduced but with (arguably) the wrong statistic (not in methods section too).

# G. “corrected” chi-sq or Fishers $p = .5576$

graphpad.com/quickcalcs...

1. Select category 2. Choose calculator 3. Enter data

## Analyze a 2x2 contingency table

Contingency tables are used to analyze counts of subjects to determine if there is a significant difference between two groups. The calculator is for 2x2 contingency tables that separate each subject into two possibilities. Simply label the rows and columns, then type in the counts for each factor. Learn more about contingency tables (along with when to use them).

Enter your data

Enter the labels and number of subjects actually observed. Don't enter percentages.

|           | C NU | CU |
|-----------|------|----|
| diabetes+ | 17   | 6  |
| diabetes- | 51   | 28 |

Which test

☐ Fisher's exact test

☒ Chi-square

☐ Chi-square with Yates' correction

P value Tails

☒ Two-tailed (recommended)

☐ One-tailed

Calculate Clear The Form

atics

1. Select category 2. Choose calculator 3. Enter data

## Analyze a 2x2 contingency table

|           | C NU | CU | Total |
|-----------|------|----|-------|
| diabetes+ | 17   | 6  | 23    |
| diabetes- | 51   | 28 | 79    |
| Total     | 68   | 34 | 102   |

Chi-square without Yates correction

Chi squared equals 0.702 with 1 degrees of freedom

The two-tailed P value equals 0.4022

The association between rows (groups) and columns (factors) is considered to be not statistically significant

# G. “corrected” chi-sq or Fisher’s $p = .5576$

## Analyze a 2x2 contingency

Contingency tables are used to analyze counts of subjects to determine if there is a significant association between two possibilities. Simply label the rows and columns, then type in the counts for each combination of the two factors. Learn more about contingency tables (along with when to use them).

### Enter your data

Enter the labels and number of subjects actually observed. Do not use percentages.

|           | C NU | CU |
|-----------|------|----|
| diabetes+ | 17   | 6  |
| diabetes- | 51   | 28 |

### Which test

- ☒ Fisher's exact test  
☐ Chi-square  
☐ Chi-square with Yates' correction

### P value Tails

- ☒ Two-tailed (recommended)  
☐ One-tailed

Calculate

Clear The Form

statistics

1. Select category

2. Choose calculator

3. Enter data

## Analyze a 2x2 contingency table

|           | C NU | CU | Total |
|-----------|------|----|-------|
| diabetes+ | 17   | 6  | 23    |
| diabetes- | 51   | 28 | 79    |
| Total     | 68   | 34 | 102   |

### Fisher's exact test

The two-tailed P value equals 0.4606

The association between rows (groups) and columns (outcomes) is considered to be not statistically significant.

The “corrected” p value is not reproduced for chi-square or Fisher’s for diabetes.

# G. “corrected” chi-sq or Fishers $p = .5576$

## Analyze a 2x2 contingency

Contingency tables are used to analyze counts of subjects to determine if there is a significant difference between two groups. The calculator is for 2x2 contingency tables that separate each subject into two possibilities. Simply label the rows and columns, then type in the counts for each factor. Learn more about contingency tables (along with when to use them).

### Enter your data

Enter the labels and number of subjects actually observed. Don't

|           | C NU | CU |
|-----------|------|----|
| diabetes+ | 17   | 6  |
| diabetes- | 51   | 28 |

### Which test

- ☐ Fisher's exact test
- ☐ Chi-square
- ☒ Chi-square with Yates' correction

### P value Tails

- ☒ Two-tailed (recommended)
- ☐ One-tailed

Calculate

Clear The Form

GraphPad  
by Dotmatics

Prism Customers Resources Support Pr

1. Select category 2. Choose calculator 3. Enter data

## Analyze a 2x2 contingency table

|           | C NU | CU | Total |
|-----------|------|----|-------|
| diabetes+ | 17   | 6  | 23    |
| diabetes- | 51   | 28 | 79    |
| Total     | 68   | 34 | 102   |

Chi-square with Yates correction

Chi squared equals 0.344 with 1 degrees of freedom.

The two-tailed P value equals 0.5576

The association between rows (groups) and columns (outcomes) is considered to be not statistically significant.

The smallest cell = 6 so Yates is **not** appropriate (Wikipedia convention).  
The p values is reproduced with an incorrect statistic (not in methods).

# H. “corrected” chi-sq or Fishers $p = .3612$

## Analyze a 2x2 contingency

Contingency tables are used to analyze counts of subjects to determine if there is a significant association between two variables. The calculator is for 2x2 contingency tables that separate each subject into two possibilities. Simply label the rows and columns, then type the counts between the two factors. Learn more about contingency tables (also called the calculator).

### Enter your data

Enter the labels and number of subjects actually observed. Don't

|      | C NU | CU |
|------|------|----|
| hbp+ | 34   | 13 |
| hbp- | 34   | 21 |

### Which test

- ☐ Fisher's exact test  
☒ Chi-square  
☐ Chi-square with 'Yates' correction

### P value Tails

- ☒ Two-tailed (recommended)  
☐ One-tailed

Calculate

Clear The Form

 **GraphPad**  
by Dotmatics

PrismCustomersResourcesSupportP

1. Select category2. Choose calculator3. Enter data

## Analyze a 2x2 contingency table

|       | C NU | CU | Total |
|-------|------|----|-------|
| hbp+  | 34   | 13 | 47    |
| hbp-  | 34   | 21 | 55    |
| Total | 68   | 34 | 102   |

**Chi-square without Yates correction**  
Chi squared equals 1.263 with 1 degrees of freedom.  
The two-tailed P value equals 0.2611.  
The association between rows (groups) and columns (outcomes) is considered to be not statistically significant.

Note large ( $>12$ ) N per cell.

# H. “corrected” chi-sq or Fishers $p = .3612$

1. Select category 2. Choose calculator 3. Enter data

## Analyze a 2x2 contingency

Contingency tables are used to analyze counts of subjects to determine if there is a significant association between two categorical variables. The calculator is for 2x2 contingency tables that separate each subject with two possibilities. Simply label the rows and columns, then type between the two factors. Learn more about contingency tables (also called contingency tables) and the calculator.

Enter your data

Enter the labels and number of subjects actually observed. Don't

|      | C NU | CU |
|------|------|----|
| hbp+ | 34   | 13 |
| hbp- | 34   | 21 |

Which test

☒ Fisher's exact test

☐ Chi-square

☐ Chi-square with Yates' correction

P value Tails

☒ Two-tailed (recommended)

☐ One-tailed

GraphPad  
by Dotmatics

Prism Customers Resources Support Pri

1. Select category 2. Choose calculator 3. Enter data

## Analyze a 2x2 contingency table

|       | C NU | CU | Total |
|-------|------|----|-------|
| hbp+  | 34   | 13 | 47    |
| hbp-  | 34   | 21 | 55    |
| Total | 68   | 34 | 102   |

Fisher's exact test

The two-tailed P value equals 0.2971

The association between rows (groups) and columns (factors) is considered to be not statistically significant



The analysis is **not** verified for chi-square or Fisher's for high blood pressure.



# H. “corrected” chi-sq or Fishers $p = .3612$

## Analyze a 2x2 contingency

Contingency tables are used to analyze counts of subjects to determine if there is a relationship between two factors. The calculator is for 2x2 contingency tables that separate each subject into two possibilities. Simply label the rows and columns, then type in the counts between the two factors. Learn more about contingency tables (also called the calculator).

### Enter your data

Enter the labels and number of subjects actually observed. Don't

|      | C NU | CU |
|------|------|----|
| hbp+ | 34   | 13 |
| hbp- | 34   | 21 |

### Which test

- ☐ Fisher's exact test
- ☐ Chi-square
- ☒ Chi-square with Yates' correction

### P value Tails

- ☒ Two-tailed (recommended)
- ☐ One-tailed

Calculate

Clear The Form

Prism Customers Resources Support Pricing

1. Select category 2. Choose calculator 3. Enter data

## Analyze a 2x2 contingency table

|       | C NU | CU | Total |
|-------|------|----|-------|
| hbp+  | 34   | 13 | 47    |
| hbp-  | 34   | 21 | 55    |
| Total | 68   | 34 | 102   |

**Chi-square with Yates correction**

Chi squared equals 0.834 with 1 degrees of freedom

The two-tailed P value equals 0.3612

The association between rows (groups) and columns (outcomes) is considered to be not statistically significant.

The smallest hypertension cell = 13 so there was **no reason** to run Yates. However, the p value was reproduced (with an incorrect statistic).

# I. “corrected” chi-sq or Fishers $p = “1”$

1. Select category 2. Choose calculator 3. Enter data

## Analyze a 2x2 contingency

Contingency tables are used to analyze counts of subjects to determine if there is a significant association between two categorical variables. Simply label the rows and columns, then type in the counts. Learn more about contingency tables (also called 2x2 tables) and the calculator.

Enter your data

Enter the labels and number of subjects actually observed. Don't

|       | C NU | CU |
|-------|------|----|
| COPD+ | 9    | 3  |
| COPD- | 59   | 31 |

Which test

☐ Fisher's exact test

☒ Chi-square

☐ Chi-square with Yates' correction

P value Tails

☒ Two-tailed (recommended)

☐ One-tailed

[Calculate](#) [Clear The Form](#)

GraphPad  
by Dotmatics

Prism Customers Resources Support Pri

1. Select category 2. Choose calculator 3. Enter data

## Analyze a 2x2 contingency table

|       | C NU | CU | Total |
|-------|------|----|-------|
| COPD+ | 9    | 3  | 12    |
| COPD- | 59   | 31 | 90    |
| Total | 68   | 34 | 102   |

Chi-square without Yates correction

Chi squared equals 0.425 with 1 degrees of freedom

The two-tailed P value equals 0.5145

The association between rows (groups) and columns (outcomes) is considered to be not statistically significant.

# I. “corrected” chi-sq or Fishers p = “1”

1. Select category 2. Choose calculator 3. Enter data

## Analyze a 2x2 contingency

Contingency tables are used to analyze counts of subjects to determine if there is a significant association between two categorical variables. The calculator is for 2x2 contingency tables that separate each subject with two possibilities. Simply label the rows and columns, then type in the counts between the two factors. Learn more about contingency tables (also known as cross-tabulation) and how to use the calculator.

### Enter your data

Enter the labels and number of subjects actually observed. Do not use percentages.

|       | C NU | CU |
|-------|------|----|
| COPD+ | 9    | 3  |
| COPD- | 59   | 31 |

### Which test

- ☒ Fisher's exact test  
☐ Chi-square  
☐ Chi-square with Yates' correction

### P value Tails

- ☒ Two-tailed (recommended)  
☐ One-tailed

Calculate

Clear The Form

 **GraphPad**  
by Dotmatics

Prism Customers Resources Support Pricing

1. Select category 2. Choose calculator 3. Enter data

## Analyze a 2x2 contingency table

|       | C NU | CU | Total |
|-------|------|----|-------|
| COPD+ | 9    | 3  | 12    |
| COPD- | 59   | 31 | 90    |
| Total | 68   | 34 | 102   |

**Fisher's exact test**  
The two-tailed P value equals 0.7463  
The association between rows (groups) and columns (outcomes) is considered to be not statistically significant.

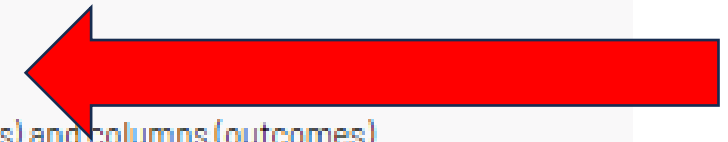

# I. “corrected” chi-sq or Fishers p = “1”

## Analyze a 2x2 contingency table

Contingency tables are used to analyze counts of subjects to determine if there is a significant difference between two groups. The calculator is for 2x2 contingency tables that separate each subject into one of two categories. Simply label the rows and columns, then type in the counts between the two factors. Learn more about contingency tables (along with the calculator).

### Enter your data

Enter the labels and number of subjects actually observed. Don't enter percentages.

|       |     |    |
|-------|-----|----|
|       | CNU | CU |
| COPD+ | 9   | 3  |
| COPD- | 59  | 31 |

### Which test

- ☐ Fisher's exact test
- ☐ Chi-square
- ☒ Chi-square with Yates' correction

### P value Tails

- ☒ Two-tailed (recommended)
- ☐ One-tailed

Calculate

Clear The Form

GraphPad  
by Dotmatics

Prism Customers Resources Support P

1. Select category 2. Choose calculator 3. Enter data

## Analyze a 2x2 contingency table

|       |     |    |       |
|-------|-----|----|-------|
|       | CNU | CU | Total |
| COPD+ | 9   | 3  | 12    |
| COPD- | 59  | 31 | 90    |
| Total | 68  | 34 | 102   |

Chi-square with Yates correction

Chi squared equals 0.106 with 1 degrees of freedom.

The two-tailed P value equals 0.7445

The association between rows (groups) and columns (outcomes) is considered to be not statistically significant.

The reported p value for COPD was **not verified** with either chi-square, Fisher's, or Yates. Note that for the small (< 5) values per cell, many statisticians would argue that Yates would be an **appropriate** analysis here. For p to = 1.000, the proportion would have to be identical in both groups. If 9 per total 68 in Cannabis Non Users, then 4.5 per 34 in Cannabis Users. Obviously, this is an impossible N so there is some error in reporting.

# J. “corrected” chi-sq or Fishers $p = .2491$

## Analyze a 2x2 contingency

Contingency tables are used to analyze counts of subjects t factors. This calculator is for 2x2 contingency tables that se on two factors, each with two possibilities. Simply label the cell to test the relationship between the two factors. Learn use each test) in the description below the calculator.

### Enter your data

Enter the labels and number of subjects actually observ

|            | C NU | CU |
|------------|------|----|
| hyperlip + | 23   | 7  |
| hyperlip - | 45   | 27 |

### Which test

- ☐ Fisher's exact test
- ☒ Chi-square
- ☐ Chi-square with Yates' correction

### P value Tails

- ☒ Two-tailed (recommended)
- ☐ One-tailed

Calculate

Clear The Form

 **GraphPad**  
by Dotmatics

1. Select category2. Choose calculator3. Enter data4. View results

## Analyze a 2x2 contingency table

|            | C NU | CU | Total |
|------------|------|----|-------|
| hyperlip + | 23   | 7  | 30    |
| hyperlip - | 45   | 27 | 72    |
| Total      | 68   | 34 | 102   |

**Chi-square without Yates correction**

Chi squared equals 1.913 with 1 degrees of freedom.

The two-tailed P value equals 0.1667

The association between rows (groups) and columns (outcomes) is considered to be not statistically significant.

# J. “corrected” chi-sq or Fishers $p = .2491$

## Analyze a 2x2 contingency table

Contingency tables are used to analyze counts of subjects to determine if there is a relationship between two factors. This calculator is for 2x2 contingency tables that separate each subject into one of two categories, each with two possibilities. Simply label the rows and columns, then enter the counts for each cell to test the relationship between the two factors. Learn more about contingency tables (and how to use each test) in the description below the calculator.

### Enter your data

Enter the labels and number of subjects actually observed. Don't enter proportions.

|            | C NU | CU |
|------------|------|----|
| hyperlip + | 23   | 7  |
| hyperlip - | 45   | 27 |

### Which test

- ☒ Fisher's exact test
- ☐ Chi-square
- ☐ Chi-square with Yates' correction

### P value Tails

- ☒ Two-tailed (recommended)
- ☐ One-tailed

Calculate

Clear The Form

 **GraphPad**  
by Dotmatics

1. Select category2. Choose calculator3. Enter data4. View results

## Analyze a 2x2 contingency table

|            | C NU | CU | Total |
|------------|------|----|-------|
| hyperlip + | 23   | 7  | 30    |
| hyperlip - | 45   | 27 | 72    |
| Total      | 68   | 34 | 102   |

**Fisher's exact test**

The two-tailed P value equals 0.2488

The association between rows (groups) and columns (hyperlipid status) is considered to be not statistically significant.

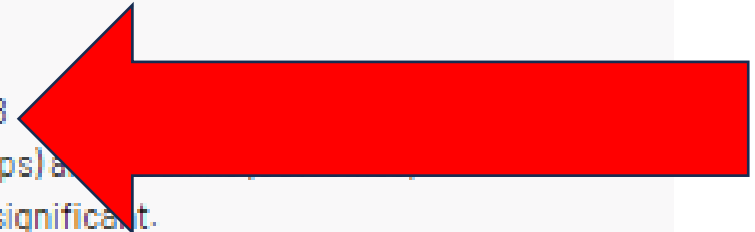

# J. “corrected” chi-sq or Fisher’s $p = .2491$

## Analyze a 2x2 contingency

Contingency tables are used to analyze counts of subjects to determine factors. This calculator is for 2x2 contingency tables that separate on two factors, each with two possibilities. Simply label the rows and columns to test the relationship between the two factors. Learn more about each test (and use each test) in the description below the calculator.

### Enter your data

Enter the labels and number of subjects actually observed. Do not

|            | C NU | CU |
|------------|------|----|
| hyperlip + | 23   | 7  |
| hyperlip - | 45   | 27 |

### Which test

- ☐ Fisher's exact test
- ☐ Chi-square
- ☒ Chi-square with Yates' correction

### P value Tails

- ☒ Two-tailed (recommended)
- ☐ One-tailed

Calculate

Clear The Form

 **GraphPad**  
by Dotmatics

1. Select category2. Choose calculator3. Enter data4. View results

## Analyze a 2x2 contingency table

|            | C NU | CU | Total |
|------------|------|----|-------|
| hyperlip + | 23   | 7  | 30    |
| hyperlip - | 45   | 27 | 72    |
| Total      | 68   | 34 | 102   |

**Chi-square with Yates correction**

Chi squared equals 1.328 with 1 degrees of freedom.

The two-tailed P value equals 0.2491

The association between rows (groups) and columns (outcomes) is considered to be not statistically significant.

The smallest cell = 7 so Yates would not be appropriate for hyperlipidemia (Wiki criteria). However, the p value was reproduced (albeit with the wrong-not in methods, statistic).

# K. “corrected” chi-sq or Fisher’s p = “1”

## Analyze a 2x2 contingency table

Contingency tables are used to analyze counts of subjects to determine if there is an association between two factors. This calculator is for 2x2 contingency tables that separate each subject into one of two categories for each factor. Simply label the rows and columns, then enter the counts for each cell to test the relationship between the two factors. Learn more about contingency tables (and how to use each test) in the description below the calculator.

### Enter your data

Enter the labels and number of subjects actually observed. Don't enter proportions.

|           | C NU | CU |
|-----------|------|----|
| other bd+ | 2    | 0  |
| other bd- | 66   | 34 |

### Which test

- ☐ Fisher's exact test
- ☒ Chi-square
- ☐ Chi-square with Yates' correction

### P value Tails

- ☒ Two-tailed (recommended)
- ☐ One-tailed

Calculate

Clear The Form

 **GraphPad**  
by Dotmatics

1. Select category2. Choose calculator3. Enter data4. View results

## Analyze a 2x2 contingency table

|           | C NU | CU | Total |
|-----------|------|----|-------|
| other bd+ | 2    | 0  | 2     |
| other bd- | 66   | 34 | 100   |
| Total     | 68   | 34 | 102   |

Chi-square without Yates correction

Chi squared equals 1.020 with 1 degrees of freedom.

The two-tailed P value equals 0.3125

The association between rows (groups) and columns (outcomes) is considered to be not statistically significant.



# K. “corrected” chi-sq or Fisher’s $p = “1”$

## Analyze a 2x2 contingency

Contingency tables are used to analyze counts of subjects to factors. This calculator is for 2x2 contingency tables that set on two factors, each with two possibilities. Simply label the cell to test the relationship between the two factors. Learn to use each test in the description below the calculator.

### Enter your data

Enter the labels and number of subjects actually observe

|           | C NU | CU |
|-----------|------|----|
| other bd+ | 2    | 0  |
| other bd- | 66   | 34 |

### Which test

- ☒ Fisher's exact test  
☐ Chi-square  
☐ Chi-square with Yates' correction

### P value Tails

- ☒ Two-tailed (recommended)  
☐ One-tailed

Calculate

Clear The Form

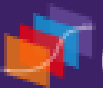 **GraphPad**  
by Dotmatics

1. Select category      2. Choose calculator      3. Enter data      4. View results

## Analyze a 2x2 contingency table

|           | C NU | CU | Total |
|-----------|------|----|-------|
| other bd+ | 2    | 0  | 2     |
| other bd- | 66   | 34 | 100   |
| Total     | 68   | 34 | 102   |

**Fisher's exact test**  
The two-tailed P value equals 0.5512  
The association between rows (groups) and columns (outcomes) is considered to be not statistically significant.

For other background diseases, the “corrected” reported p-value was not verified with either Chi-square or Fisher’s.

# K. “corrected” chi-sq or Fishers p = “1”

## Analyze a 2x2 contingency

Contingency tables are used to analyze counts of subjects to determine the relationship between two factors. This calculator is for 2x2 contingency tables that separate subjects on two factors, each with two possibilities. Simply label the row and column cell to test the relationship between the two factors. Learn more about each test (and how to use each test) in the description below the calculator.

### Enter your data

Enter the labels and number of subjects actually observed. If you have a 2x2 contingency table, enter the counts for each cell.

|           | C NU | CU |
|-----------|------|----|
| other bd+ | 2    | 0  |
| other bd- | 66   | 34 |

### Which test

- ☐ Fisher's exact test
- ☐ Chi-square
- ☒ Chi-square with Yates' correction

### P value Tails

- ☒ Two-tailed (recommended)
- ☐ One-tailed

Calculate

Clear The Form

GraphPad  
by Dotmatics

1. Select category 2. Choose calculator 3. Enter data 4. View results

## Analyze a 2x2 contingency table

|           | C NU | CU | Total |
|-----------|------|----|-------|
| other bd+ | 2    | 0  | 2     |
| other bd- | 66   | 34 | 100   |
| Total     | 68   | 34 | 102   |

Chi-square with Yates correction  
Chi squared equals 0.064 with 1 degrees of freedom  
The two-tailed P value equals 0.8007  
The association between rows (groups) and columns (outcomes) is considered to be not statistically significant.

For other background diseases, the reported p-value was not verified with either chi-square, Fisher's, or Yates. For  $p = 1.000$ , the % would have to be identical for both groups. If 2 per 68 total for CNU, then 1 per 34 for the CU group. As this was not listed, there appears to be an error in the original data.

# L. “corrected” chi-sq or Fishers $p = .8325$

## Analyze a 2x2 contingency table

Contingency tables are used to analyze counts of subjects to determine if there is association between two factors. This calculator is for 2x2 contingency tables that separate each subject into two categories based on two factors, each with two possibilities. Simply label the rows and columns and type in the counts for each cell to test the relationship between the two factors. Learn more about contingency tables (along with when to use each test) in the description below the calculator.

### Enter your data

Enter the labels and number of subjects actually observed. Don't enter proportions, percentages or means.

|        | C NU | CU |
|--------|------|----|
| nscic+ | 37   | 20 |
| nscic- | 31   | 14 |

### Which test

- ☐ Fisher's exact test
- ☒ Chi-square
- ☐ Chi-square with Yates' correction

### P value Tails

- ☒ Two-tailed (recommended)
- ☐ One-tailed

 **GraphPad**  
by Dotmatics

1. Select category      2. Choose calculator      3. Enter data      4. View results

## Analyze a 2x2 contingency table

|        | C NU | CU | Total |
|--------|------|----|-------|
| nscic+ | 37   | 20 | 57    |
| nscic- | 31   | 14 | 45    |
| Total  | 68   | 34 | 102   |

Chi-square without Yates correction

Chi squared equals 0.179 with 1 degrees of freedom.

The two-tailed P value equals 0.6723

The association between rows (groups) and columns (outcomes) is considered to be not statistically significant.



L. “corrected” chi-sq or Fishers  $p = .8325$

Contingency tables are used to analyze counts of subjects in two categories based on two factors, each with two possible types in the counts for each cell to test the relationship between contingency tables (along with when to use each test)!

**Enter your data**  
Enter the labels and number of subjects actually observed, percentages or means.

|        | C NU | CU |
|--------|------|----|
| nscic+ | 37   | 20 |
| nscic- | 31   | 14 |

**Which test**

☒ Fisher's exact test

☐ Chi-square

☐ Chi-square with Yates' correction

**P value Tails**

☒ Two-tailed (recommended)

☐ One-tailed

**Calculate** **Clear The Form**

**GraphPad**  
by Dotmatics

1. Select category      2. Choose calculator      3. Enter data

## Analyze a 2x2 contingency table

|        | C NU | CU | Total |
|--------|------|----|-------|
| nscic+ | 37   | 20 | 57    |
| nscic- | 31   | 14 | 45    |
| Total  | 68   | 34 | 102   |

**Fisher's exact test**  
The two-tailed P value equals 0.8327  
The association between rows (groups) and columns (outcomes) is considered to be not statistically significant.

Not verified.

# L. “corrected” chi-sq or Fishers $p = .8325$

## Enter your data

Enter the labels and number of subjects actually observed percentages or means.

|        | C NU | CU |
|--------|------|----|
| nscic+ | 37   | 20 |
| nscic- | 31   | 14 |

## Which test

- ☐ Fisher's exact test
- ☐ Chi-square
- ☒ Chi-square with Yates' correction

## P value Tails

- ☒ Two-tailed (recommended)
- ☐ One-tailed

Calculate

Clear The Form

GraphPad  
by Dotmatics

1. Select category 2. Choose calculator 3. Enter data 4. View results

### Analyze a 2x2 contingency table

|        | C NU | CU | Total |
|--------|------|----|-------|
| nscic+ | 37   | 20 | 57    |
| nscic- | 31   | 14 | 45    |
| Total  | 68   | 34 | 102   |

Chi-square with Yates correction  
Chi squared equals 0.045 with 1 degrees of freedom  
The two-tailed P value equals 0.8325  
The association between rows (groups) and columns (outcomes)  
is considered to be not statistically significant.

With the smallest cell = 14, Yates is the **wrong** statistic.  
However, the p-value is reproduced for non small cell lung cancer.

# M. “corrected” chi-sq or Fishers $p = .414$

## Enter your data

Enter the labels and number of subjects actually percentages or means.

|           |      |    |
|-----------|------|----|
|           | C NU | CU |
| melanoma+ | 25   | 9  |
| melanoma- | 43   | 25 |

## Which test

- ☐ Fisher's exact test
- ☒ Chi-square
- ☐ Chi-square with Yates' correction

## P value Tails

- ☒ Two-tailed (recommended)
- ☐ One-tailed

Calculate

Clear The Form

 **GraphPad**  
by Dotmatics

1. Select category   2. Choose calculator   3. Enter data   4. View results

## Analyze a 2x2 contingency table

|           |      |    |       |
|-----------|------|----|-------|
|           | C NU | CU | Total |
| melanoma+ | 25   | 9  | 34    |
| melanoma- | 43   | 25 | 68    |
| Total     | 68   | 34 | 102   |

**Chi-square without Yates correction**

Chi squared equals 1.081 with 1 degrees of freedom

The two-tailed P value equals 0.2985

The association between rows (groups) and columns (variables) is considered to be not statistically significant

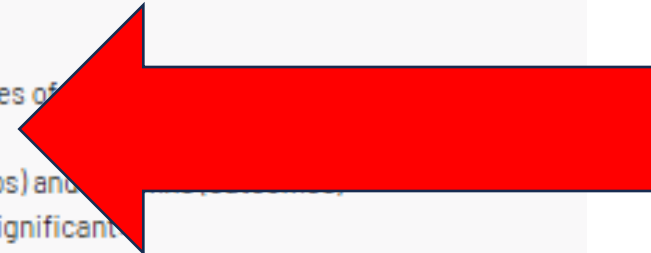

# M. “corrected” chi-sq or Fishers $p = .414$

## Enter your data

Enter the labels and number of subjects actually observed percentages or means.

|           | C NU | CU |
|-----------|------|----|
| melanoma+ | 25   | 9  |
| melanoma- | 43   | 25 |

## Which test

- ☒ Fisher's exact test
- ☐ Chi-square
- ☐ Chi-square with Yates' correction

## P value Tails

- ☒ Two-tailed (recommended)
- ☐ One-tailed

Calculate

Clear The Form

 **GraphPad**  
by Dotmatics

1. Select category    2. Choose calculator    3. Enter data    4. View results

## Analyze a 2x2 contingency table

|           | C NU | CU | Total |
|-----------|------|----|-------|
| melanoma+ | 25   | 9  | 34    |
| melanoma- | 43   | 25 | 68    |
| Total     | 68   | 34 | 102   |

**Fisher's exact test**

The two-tailed P value equals 0.3750

The association between rows (groups) and columns (variables) is considered to be not statistically significant

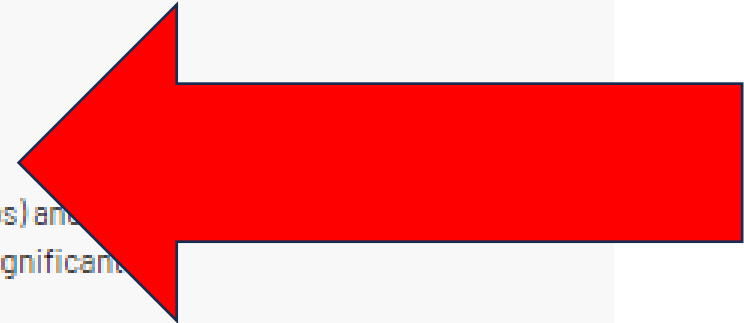

The reported “corrected” p values for melanoma were not verified with chi-square or Fisher’s.

# M. “corrected” chi-sq or Fishers $p = .414$

## Enter your data

Enter the labels and number of subjects actually or percentages or means.

|           |      |    |
|-----------|------|----|
|           | C NU | CU |
| melanoma+ | 25   | 9  |
| melanoma- | 43   | 25 |

## Which test

- ☐ Fisher's exact test
- ☐ Chi-square
- ☒ Chi-square with Yates' correction

## P value Tails

- ☒ Two-tailed (recommended)
- ☐ One-tailed

Calculate

Clear The Form

GraphPad  
by Dotmatics

1. Select category 2. Choose calculator 3. Enter data 4. View results

## Analyze a 2x2 contingency table

|           |      |    |       |
|-----------|------|----|-------|
|           | C NU | CU | Total |
| melanoma+ | 25   | 9  | 34    |
| melanoma- | 43   | 25 | 68    |
| Total     | 68   | 34 | 102   |

Chi-square with Yates correction

Chi squared equals 0.667 with 1 degrees of freedom.

The two-tailed P value equals 0.4140

The association between rows (groups) and columns (outcomes) is considered to be not statistically significant.

With a smallest N / cell of 9, Yates is an **inappropriate** statistic. However, this corresponds with the p-value reported.



# N. “corrected” chi-sq or Fishers $p = “1”$

## Enter your data

Enter the labels and number of subjects actually observed percentages or means.

|      |      |    |
|------|------|----|
|      | C NU | CU |
| RCC+ | 4    | 2  |
| RCC- | 64   | 32 |

## Which test

- ☐ Fisher's exact test
- ☒ Chi-square
- ☐ Chi-square with Yates' correction

## P value Tails

- ☒ Two-tailed (recommended)
- ☐ One-tailed

Calculate

Clear The Form

GraphPad  
by Dotmatics

1. Select category 2. Choose calculator 3. Enter data 4. View result

## Analyze a 2x2 contingency table

|       |      |    |       |
|-------|------|----|-------|
|       | C NU | CU | Total |
| RCC+  | 4    | 2  | 6     |
| RCC-  | 64   | 32 | 96    |
| Total | 68   | 34 | 102   |

Chi-square without Yates correction  
Chi squared equals 0.000 with 1 degrees of freedom  
The two-tailed P value equals 1.0000  
The association between rows (groups) and columns (outcomes)  
is considered to be not statistically significant.

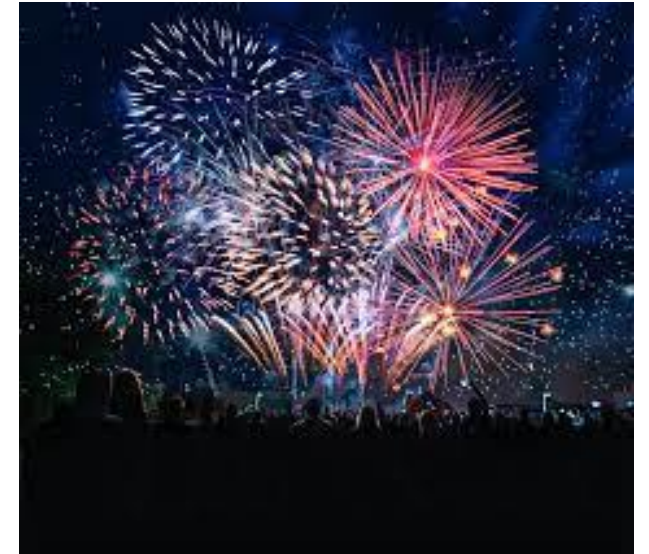

The reported p value for Renal Cell Carcinoma is verified!

# N. “corrected” chi-sq or Fishers p = “1”

## Enter your data

Enter the labels and number of subjects actually observed. Don't

|      | C NU | CU |
|------|------|----|
| RCC+ | 4    | 2  |
| RCC- | 64   | 32 |

## Which test

- ☒ Fisher's exact test
- ☐ Chi-square
- ☐ Chi-square with Yates' correction

## P value Tails

- ☒ Two-tailed (recommended)
- ☐ One-tailed

Calculate

Clear The Form

## Analyze a 2x2 contingency table

|       | C NU | CU | Total |
|-------|------|----|-------|
| RCC+  | 4    | 2  | 6     |
| RCC-  | 64   | 32 | 96    |
| Total | 68   | 34 | 102   |

## Fisher's exact test

The two-tailed P value equals 1.0000

The association between rows (groups) and columns (parameters) is considered to be not statistically significant.

The result has been verified!

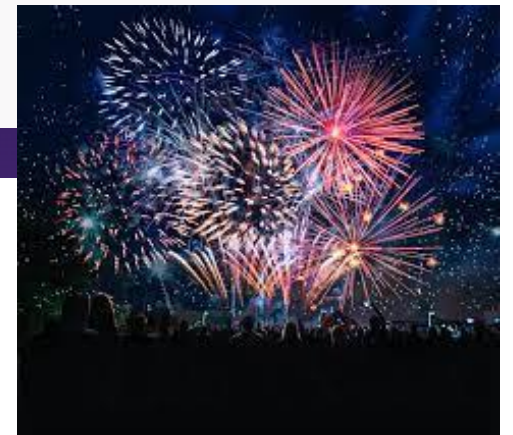

# N. “corrected” chi-sq or Fishers $p = “1”$

## Enter your data

Enter the labels and number of subjects actually observed. Don't

|      |      |    |
|------|------|----|
|      | C NU | CU |
| RCC+ | 4    | 2  |
| RCC- | 64   | 32 |

## Which test

- ☐ Fisher's exact test
- ☐ Chi-square
- ☒ Chi-square with Yates' correction

## P value Tails

- ☒ Two-tailed (recommended)
- ☐ One-tailed

Calculate

Clear The Form

GraphPad  
by Dotmatics

Prism Customers Resources Support

1. Select category 2. Choose calculator 3. Enter data

## Analyze a 2x2 contingency table

|       |      |    |       |
|-------|------|----|-------|
|       | C NU | CU | Total |
| RCC+  | 4    | 2  | 6     |
| RCC-  | 64   | 32 | 96    |
| Total | 68   | 34 | 102   |

Chi-square with Yates correction

Chi squared equals 0.000 with 1 degrees of freedom

The two-tailed P value equals 1.0000

The association between rows (groups) and columns (outcomes) is considered to be not statistically significant.

In this circumstance, all three statistics give the same result.

# O. “corrected” chi-sq or Fishers p = “1”

## Enter your data

Enter the labels and number of subjects actually observed. Don't

|            |      |    |
|------------|------|----|
|            | C NU | CU |
| other mal+ | 2    | 3  |
| other mal- | 66   | 31 |

## Which test

- ☐ Fisher's exact test
- ☒ Chi-square
- ☐ Chi-square with Yates' correction

## P value Tails

- ☒ Two-tailed (recommended)
- ☐ One-tailed

Calculate

Clear The Form

ad  
otics

Prism Customers Resources Support

1. Select category 2. Choose calculator 3. Enter data

## Analyze a 2x2 contingency table

|            |      |    |       |
|------------|------|----|-------|
|            | C NU | CU | Total |
| other mal+ | 2    | 3  | 5     |
| other mal- | 66   | 31 | 97    |
| Total      | 68   | 34 | 102   |

Chi-square without Yates correction

Chi squared equals 1.682 with 1 degrees of freedom

The two-tailed P value equals 0.1946

The association between rows (groups) and columns (variables) is considered to be not statistically significant.

# O. “corrected” chi-sq or Fishers p = “1”

Enter your data

Enter the labels and number of subjects actually observed. Don't e

|            |      |    |
|------------|------|----|
|            | C NU | CU |
| other mal+ | 2    | 3  |
| other mal- | 66   | 31 |

Which test

- ☒ Fisher's exact test
- ☐ Chi-square
- ☐ Chi-square with Yates' correction

P value Tails

- ☒ Two-tailed (recommended)
- ☐ One-tailed

Calculate

Clear The Form

ad  
tics

Prism Customers Resources Support P

1. Select category 2. Choose calculator 3. Enter data

## Analyze a 2x2 contingency table

|            |      |    |       |
|------------|------|----|-------|
|            | C NU | CU | Total |
| other mal+ | 2    | 3  | 5     |
| other mal- | 66   | 31 | 97    |
| Total      | 68   | 34 | 102   |

Fisher's exact test

The two-tailed P value equals 0.3300

The association between rows (groups) and columns (variables) is considered to be not statistically significant.

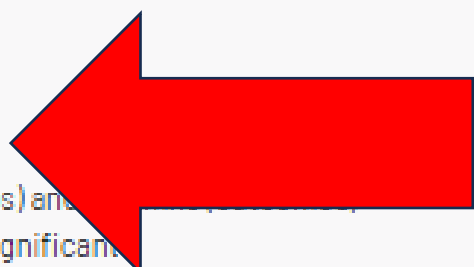

The reported p-value was **not** verified.

# O. “corrected” chi-sq or Fishers p = “1”

## Enter your data

Enter the labels and number of subjects actually observed. Don't

|            |      |    |
|------------|------|----|
|            | C NU | CU |
| other mal+ | 2    | 3  |
| other mal- | 66   | 31 |

## Which test

- ☐ Fisher's exact test
- ☐ Chi-square
- ☒ Chi-square with Yates' correction

## P value Tails

- ☒ Two-tailed (recommended)
- ☐ One-tailed

Calculate

Clear The Form

Prism Customers Resources Support

1. Select category 2. Choose calculator 3. Enter data

## Analyze a 2x2 contingency table

|            |      |    |       |
|------------|------|----|-------|
|            | C NU | CU | Total |
| other mal+ | 2    | 3  | 5     |
| other mal- | 66   | 31 | 97    |
| Total      | 68   | 34 | 102   |

Chi-square with Yates correction

Chi squared equals 0.657 with 1 degrees of freedom.

The two-tailed P value equals 0.4175

The association between rows (groups) and columns (outcomes) is considered to be not statistically significant.

The reported p value for other malignancies was **not** verified.

# P. “corrected” chi-sq or Fishers $p = .6593$

Enter your data

Enter the labels and number of subjects actually observed. Don

|         |      |    |
|---------|------|----|
|         | C NU | CU |
| brain + | 12   | 8  |
| brain-  | 56   | 26 |

Which test

- ☐ Fisher's exact test
- ☒ Chi-square
- ☐ Chi-square with Yates' correction

P value Tails

- ☒ Two-tailed (recommended)
- ☐ One-tailed

Calculate

Clear The Form

1. Select category

2. Choose calculator

3. Enter data

## Analyze a 2x2 contingency table

|         | C NU | CU | Total |
|---------|------|----|-------|
| brain + | 12   | 8  | 20    |
| brain-  | 56   | 26 | 82    |
| Total   | 68   | 34 | 102   |

Chi-square without Yates correction

Chi squared equals 0.498 with 1 degrees of freedom

The two-tailed P value equals 0.4806

The association between rows (groups) and columns (outcomes) is considered to be not statistically significant.

P. “corrected” chi-sq or Fishers  $p = .6593$

#### Enter your data

Enter the labels and number of subjects actually observed. Don't

|         | C NU | CU |
|---------|------|----|
| brain + | 12   | 8  |
| brain-  | 56   | 26 |

#### Which test

- ☒ Fisher's exact test
- ☐ Chi-square
- ☐ Chi-square with Yates' correction

#### P value Tails

- ☒ Two-tailed (recommended)
- ☐ One-tailed

Calculate

Clear The Form

Pad  
atics

Prism Customers Resources Support

1. Select category 2. Choose calculator 3. Enter data

## Analyze a 2x2 contingency table

|         | C NU | CU | Total |
|---------|------|----|-------|
| brain + | 12   | 8  | 20    |
| brain-  | 56   | 26 | 82    |
| Total   | 68   | 34 | 102   |

Fisher's exact test

The two-tailed P value equals 0.5976

The association between rows (groups) and columns (outcomes) is considered to be not statistically significant.

The reported p-values for brain metastasis were **not** verified.



P. “corrected” chi-sq or Fishers  $p = .6593$

#### Enter your data

Enter the labels and number of subjects actually observed. Do

|         | C NU | CU |
|---------|------|----|
| brain + | 12   | 8  |
| brain-  | 56   | 26 |

#### Which test

- ☐ Fisher's exact test
- ☐ Chi-square
- ☒ Chi-square with Yates' correction

#### P value Tails

- ☒ Two-tailed (recommended)
- ☐ One-tailed

Calculate

Clear The Form

### Analyze a 2x2 contingency table

|         | C NU | CU | Total |
|---------|------|----|-------|
| brain + | 12   | 8  | 20    |
| brain-  | 56   | 26 | 82    |
| Total   | 68   | 34 | 102   |

#### Chi-square with Yates correction

Chi squared equals 0.194 with 1 degrees of freedom

The two-tailed P value equals 0.6593

The association between rows (groups) and columns (variables) is considered to be not statistically significant.

For the smallest N per cell = 8, Yates would typically not be considered the right statistic. However, the reported p value corresponds with Yates.

Q. “corrected” chi-sq or Fishers  $p = .4303$

#### Enter your data

Enter the labels and number of subjects actually observed. Don't e

|         | C NU | CU |
|---------|------|----|
| lungs + | 39   | 23 |
| lungs-  | 29   | 11 |

#### Which test

- ☐ Fisher's exact test
- ☒ Chi-square
- ☐ Chi-square with Yates' correction

#### P value Tails

- ☒ Two-tailed (recommended)
- ☐ One-tailed

Calculate

Clear The Form

## Analyze a 2x2 contingency table

|         | C NU | CU | Total |
|---------|------|----|-------|
| lungs + | 39   | 23 | 62    |
| lungs-  | 29   | 11 | 40    |
| Total   | 68   | 34 | 102   |

#### Chi-square without Yates correction

Chi squared equals 1.008 with 1 degrees of freedom

The two-tailed P value equals 0.3155

The association between rows (groups) and columns (outcomes) is considered to be not statistically significant.

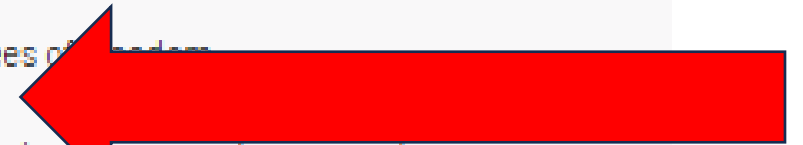

Q. “corrected” chi-sq or Fishers p = .4303

#### Enter your data

Enter the labels and number of subjects actually observed. Don't

|         |      |    |
|---------|------|----|
|         | C NU | CU |
| lungs + | 39   | 23 |
| lungs-  | 29   | 11 |

#### Which test

- ☒ Fisher's exact test
- ☐ Chi-square
- ☐ Chi-square with Yates' correction

#### P value Tails

- ☒ Two-tailed (recommended)
- ☐ One-tailed

Calculate

Clear The Form

1. Select category

2. Choose calculator

3. Enter data

## Analyze a 2x2 contingency table

|         | C NU | CU | Total |
|---------|------|----|-------|
| lungs + | 39   | 23 | 62    |
| lungs-  | 29   | 11 | 40    |
| Total   | 68   | 34 | 102   |

#### Fisher's exact test

The two-tailed P value equals 0.3914

The association between rows (groups) and columns (outcomes) is considered to be not statistically significant.

The reported p value for lung metastasis could **not** be verified.

Q. “corrected” chi-sq or Fisher’s  $p = .4303$

Enter your data

Enter the labels and number of subjects actually observed. Don't

|         | C NU | CU |
|---------|------|----|
| lungs + | 39   | 23 |
| lungs-  | 29   | 11 |

Which test

☐ Fisher's exact test

☐ Chi-square

☒ Chi-square with Yates' correction

P value Tails

☒ Two-tailed (recommended)

☐ One-tailed

Dotmatics

1. Select category 2. Choose calculator 3. Enter data

## Analyze a 2x2 contingency table

|         | C NU | CU | Total |
|---------|------|----|-------|
| lungs + | 39   | 23 | 62    |
| lungs-  | 29   | 11 | 40    |
| Total   | 68   | 34 | 102   |

Chi-square with Yates correction

Chi squared equals 0.622 with 1 degrees of freedom

The two-tailed P value equals 0.4303

The association between rows (groups) and columns (outcomes) is considered to be not statistically significant.

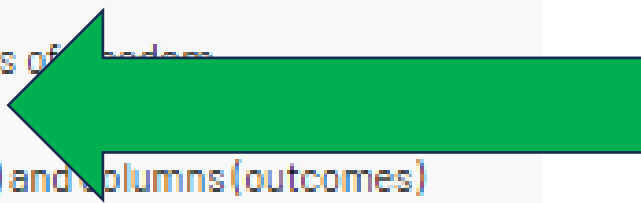

With the smallest N per cell = 11, Yates correction is typically **not** employed. However, the p-value can be reproduced.

# R. “corrected” chi-sq or Fishers $p = .2157$

## Enter your data

Enter the labels and number of subjects actually observed means.

|         |      |    |
|---------|------|----|
|         | C NU | CU |
| liver + | 13   | 11 |
| liver-  | 55   | 23 |

## Which test

- ☐ Fisher's exact test
- ☒ Chi-square
- ☐ Chi-square with Yates' correction

## P value Tails

- ☒ Two-tailed (recommended)
- ☐ One-tailed

Calculate

Clear The Form

GraphPad  
by Dotmatics

1. Select category2. Choose calculator3. Enter data4. View results

## Analyze a 2x2 contingency table

|         |      |    |       |
|---------|------|----|-------|
|         | C NU | CU | Total |
| liver + | 13   | 11 | 24    |
| liver-  | 55   | 23 | 78    |
| Total   | 68   | 34 | 102   |

Chi-square without Yates correction

Chi squared equals 2.207 with 1 degrees of freedom

The two-tailed P value equals 0.1374

The association between rows (groups) and columns (outcomes) is considered to be not statistically significant.

Note large  $\geq 11$  cell values.

# R. “corrected” chi-sq or Fishers $p = .2157$

## Enter your data

Enter the labels and number of subjects actually observe means.

|         | C NU | CU |
|---------|------|----|
| liver + | 13   | 11 |
| liver-  | 55   | 23 |

## Which test

- ☒ Fisher's exact test
- ☐ Chi-square
- ☐ Chi-square with Yates' correction

## P value Tails

- ☒ Two-tailed (recommended)
- ☐ One-tailed

Calculate

Clear The Form

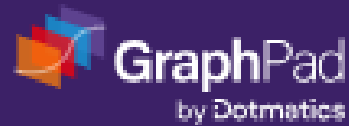

1. Select category

2. Choose calculator

3. Enter data

4. View

## Analyze a 2x2 contingency table

|         | C NU | CU | Total |
|---------|------|----|-------|
| liver + | 13   | 11 | 24    |
| liver-  | 55   | 23 | 78    |
| Total   | 68   | 34 | 102   |

### Fisher's exact test

The two-tailed P value equals 0.1468

The association between rows (groups) and columns (outcomes) is considered to be not statistically significant.

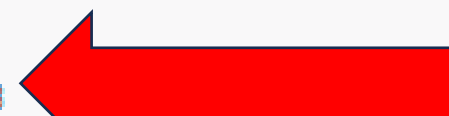

The reported p-values could **not** be verified.

# R. “corrected” chi-sq or Fishers $p = .2157$

## Enter your data

Enter the labels and number of subjects actually observed means.

|         | C NU | CU |
|---------|------|----|
| liver + | 13   | 11 |
| liver-  | 55   | 23 |

## Which test

- ☐ Fisher's exact test
- ☐ Chi-square
- ☒ Chi-square with Yates' correction

## P value Tails

- ☒ Two-tailed (recommended)
- ☐ One-tailed

Calculate

Clear The Form

GraphPad  
by Dotmatics

1. Select category 2. Choose calculator 3. Enter data 4. View

## Analyze a 2x2 contingency table

|         | C NU | CU | Total |
|---------|------|----|-------|
| liver + | 13   | 11 | 24    |
| liver-  | 55   | 23 | 78    |
| Total   | 68   | 34 | 102   |

Chi-square with Yates correction  
Chi squared equals 1.532 with 1 degrees of freedom.  
The two-tailed P value equals 0.2157  
The association between rows (groups) and columns (outcomes)  
is considered to be not statistically significant.

With the smallest N per cell = 11, Yates is **not** appropriate.  
However, the p value is reproduced with this incorrect statistic.

Table 1. *Cont.* (page 2)

|   | Characteristics                        | Cannabis Non-Users<br>N = 68 | Cannabis Users<br>N = 34 | p-Value | Chi-sq | Fisher's | Chi-sq<br>w/Yates |
|---|----------------------------------------|------------------------------|--------------------------|---------|--------|----------|-------------------|
| S | Immunotherapy given as—N (%)           |                              |                          |         |        |          |                   |
|   | First line of treatment                | 31 (45.5)<br>45.6            | 8 (23.5)<br>23.5         | 0.05178 | .0307  | .0334    | .0518             |
|   | Second line of treatment or more       | 37 (54.4)<br>54.4            | 26 (76.4)<br>76.5        | 0.05178 |        |          |                   |
| T | Checkpoint therapy—N (%)               |                              |                          |         |        |          |                   |
| U | Anti PD1: Pembrolizumab or Nivolumab   | 47 (69.1)<br>69.1            | 29 (85.2)<br>85.3        | 0.127   | .0772  | .0945    | .1270             |
| V | Ipilimumab and Nivolumab               | 16 (23.5)<br>23.5            | 4 (11.7)<br>11.8         | 0.2517  | .1583  | .1934    | .2517             |
|   | Anti PDL-1: Durvalumab or Atezolizumab | 5 (7.3)<br>7.4               | 1 (2.9)<br>2.9           | 1       | .3720  | .6607    | .6554             |

Key: **green** = % calculated (rounded) correctly  
**red** = % calculated (rounding) incorrectly

P values calculated with GraphPad Prism. Although it is theoretically possible that the differences are due to software (Bel-Sala used SAS), we think this is exceedingly unlikely for simple non-parametric statistic like this. It is much more likely (based on values corresponding to 4 decimal places) that the authors simply ran a different statistic than was reported. Unfortunately, the statistic that was run (chi-square with Yates correction) is (again) only appropriate with a expected cell N of  $< 5$  (Wikipedia) Or 0-9 (BMJ Guidance).



S. “corrected” chi-sq or Fisher’s p value is .05178

graphpad.com/quick...

AMP Gmail Im Speedtest

calculator is for 2x2 contingency tables that separate each subject into two possibilities. Simply label the rows and columns, then type in the factors. Learn more about contingency tables (along with when to use)

**Enter your data**

Enter the labels and number of subjects actually observed. Don't

|        | C NU | CU |
|--------|------|----|
| im 1st | 31   | 8  |
| im 2nd | 37   | 26 |

**Which test**

☐ Fisher's exact test

☒ Chi-square

☐ Chi-square with Yates' correction

**P value Tails**

☒ Two-tailed (recommended)

☐ One-tailed

**Calculate** **Clear The Form**

graphpad.com/quick... Canvas2

GraphPad  
by Dotmatics

1. Select category 2. Choose calculator 3. Enter data

### Analyze a 2x2 contingency table

|        | C NU | CU | Total |
|--------|------|----|-------|
| im 1st | 31   | 8  | 39    |
| im 2nd | 37   | 26 | 63    |
| Total  | 68   | 34 | 102   |

**Chi-square without Yates correction**

Chi squared equals 4.670 with 1 degrees of freedom.

The two-tailed P value equals 0.0307

The association between rows (groups) and columns (outcomes) is considered to be statistically significant.

It is interesting that this is the only p value on Table 1 that the authors reported to 5 decimal places.

S. “corrected” chi-sq or Fisher’s p value is .05178

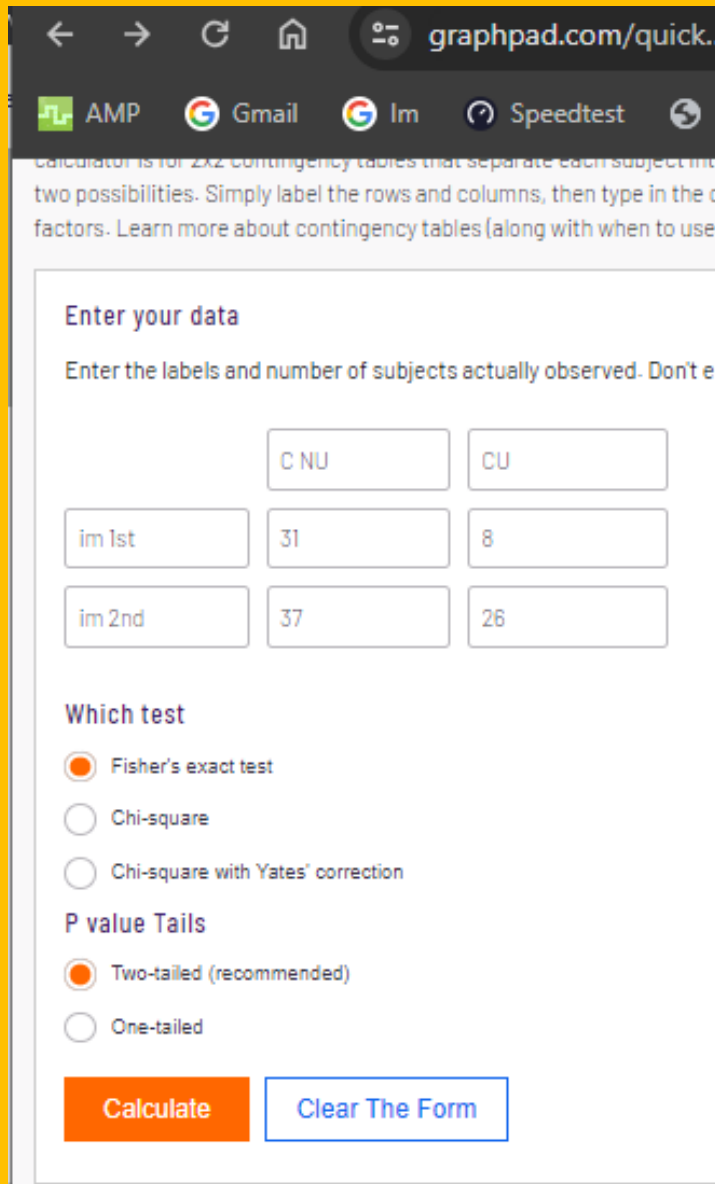

graphpad.com/quick...

AMP Gmail Im Speedtest

calculator is for 2x2 contingency tables that separate each subject into two possibilities. Simply label the rows and columns, then type in the counts. Learn more about contingency tables (along with when to use them).

**Enter your data**

Enter the labels and number of subjects actually observed. Don't enter percentages.

|        | C NU | CU |
|--------|------|----|
| im 1st | 31   | 8  |
| im 2nd | 37   | 26 |

**Which test**

☒ Fisher's exact test

☐ Chi-square

☐ Chi-square with Yates' correction

**P value Tails**

☒ Two-tailed (recommended)

☐ One-tailed

**Calculate** **Clear The Form**

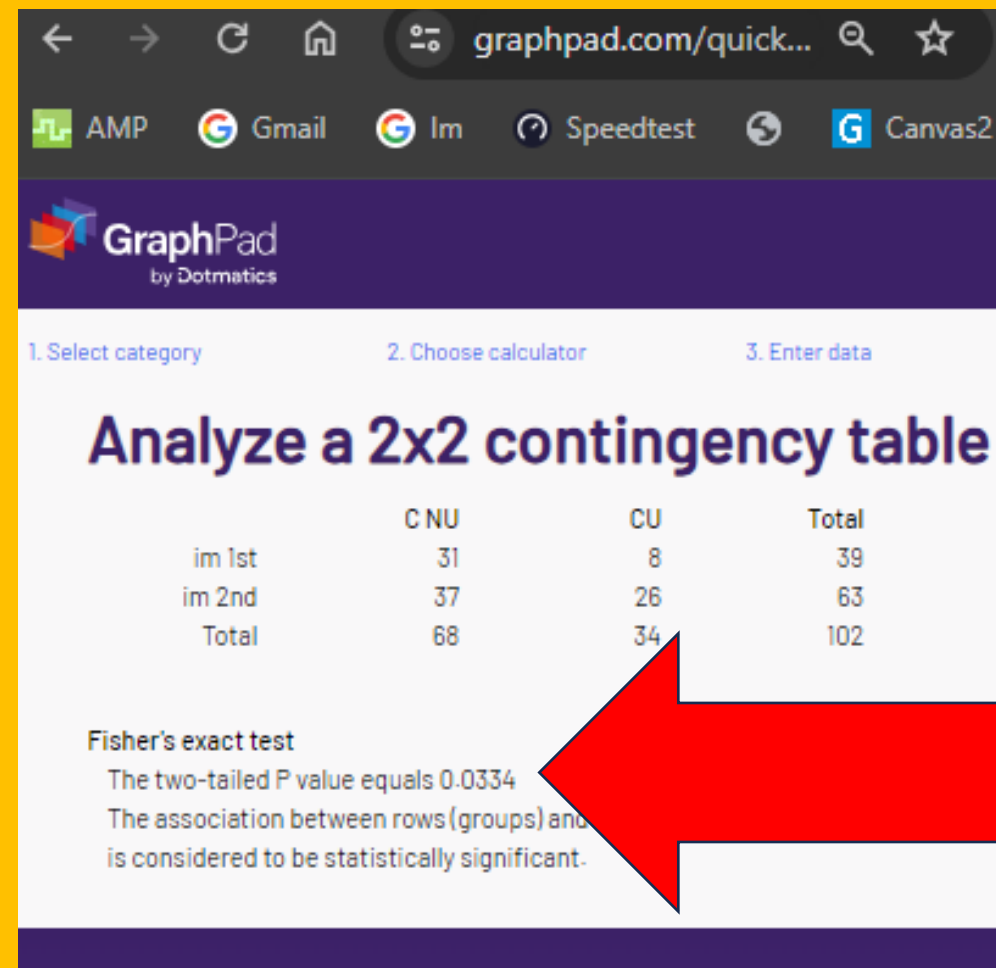

graphpad.com/quick... Canvas2

GraphPad by Dotmatics

1. Select category 2. Choose calculator 3. Enter data

### Analyze a 2x2 contingency table

|        | C NU | CU | Total |
|--------|------|----|-------|
| im 1st | 31   | 8  | 39    |
| im 2nd | 37   | 26 | 63    |
| Total  | 68   | 34 | 102   |

**Fisher's exact test**

The two-tailed P value equals 0.0334

The association between rows (groups) and columns (outcomes) is considered to be statistically significant.

The reported p value for immunotherapy 1<sup>st</sup> vs 2<sup>nd</sup> could not be verified with either chi-square or Fisher's exact test. As this manuscript is about immunotherapy, this significant ( $p < .05$ ) difference could be an important confound. This was not addressed in the data-analysis (e.g. ANCOVA) or in the discussion section.

S. “corrected” chi-sq or Fisher’s p value is .05178

graphpad.com/quick

AMP Gmail Im Speedtest

calculator is for 2x2 contingency tables that separate each subject into two possibilities. Simply label the rows and columns, then type in the factors. Learn more about contingency tables (along with when to use)

Enter your data

Enter the labels and number of subjects actually observed. Don't

|        | C NU | CU |
|--------|------|----|
| im 1st | 31   | 8  |
| im 2nd | 37   | 26 |

Which test

☐ Fisher's exact test

☐ Chi-square

☒ Chi-square with Yates' correction

P value Tails

☒ Two-tailed (recommended)

☐ One-tailed

Calculate Clear The Form

GraphPad  
by Dotmatics

1. Select category 2. Choose calculator 3. Enter data

## Analyze a 2x2 contingency table

|        | C NU | CU | Total |
|--------|------|----|-------|
| im 1st | 31   | 8  | 39    |
| im 2nd | 37   | 26 | 63    |
| Total  | 68   | 34 | 102   |

Chi-square with Yates correction

Chi squared equals 3.783 with 1 degrees of freedom

The two-tailed P value equals 0.0518

The association between rows (groups) and columns (outcomes) is considered to be not quite statistically significant.

The smallest cell N is 8 so Yates would **not** be appropriate. Although Prism only reports to 4 decimal places, with rounding, the “corrected” p value is reproduced, albeit with a statistic that is both inappropriate (arguably) and not described in the methods.

T. “corrected” chi-sq or Fisher’s = .127

## Analyze a 2x2 contingency

Contingency tables are used to analyze counts of subjects to determine if there is a significant difference between two groups. The calculator is for 2x2 contingency tables that separate each subject into two possibilities. Simply label the rows and columns, then type in the counts. Learn more about contingency tables (along with when to use them).

### Enter your data

Enter the labels and number of subjects actually observed. Don't

|          | C NU | CU |
|----------|------|----|
| Anti PD1 | 47   | 29 |
| other    | 21   | 5  |

### Which test

- ☐ Fisher's exact test
- ☒ Chi-square
- ☐ Chi-square with Yates' correction

### P value Tails

- ☒ Two-tailed (recommended)
- ☐ One-tailed

Calculate

Clear The Form

graphpad.com/quick...

AMP Gmail Im Speedtest Canvas2

GraphPad  
by Dotmatics

1. Select category 2. Choose calculator 3. Enter data

## Analyze a 2x2 contingency table

|          | C NU | CU | Total |
|----------|------|----|-------|
| Anti PD1 | 47   | 29 | 76    |
| other    | 21   | 5  | 26    |
| Total    | 68   | 34 | 102   |

Chi-square without Yates correction

Chi squared equals 3.123 with 1 degrees of freedom.

The two-tailed P value equals 0.0772

The association between rows (groups) and columns (outcomes) is considered to be not quite statistically significant.



T. “corrected” chi-sq or Fisher’s = .127

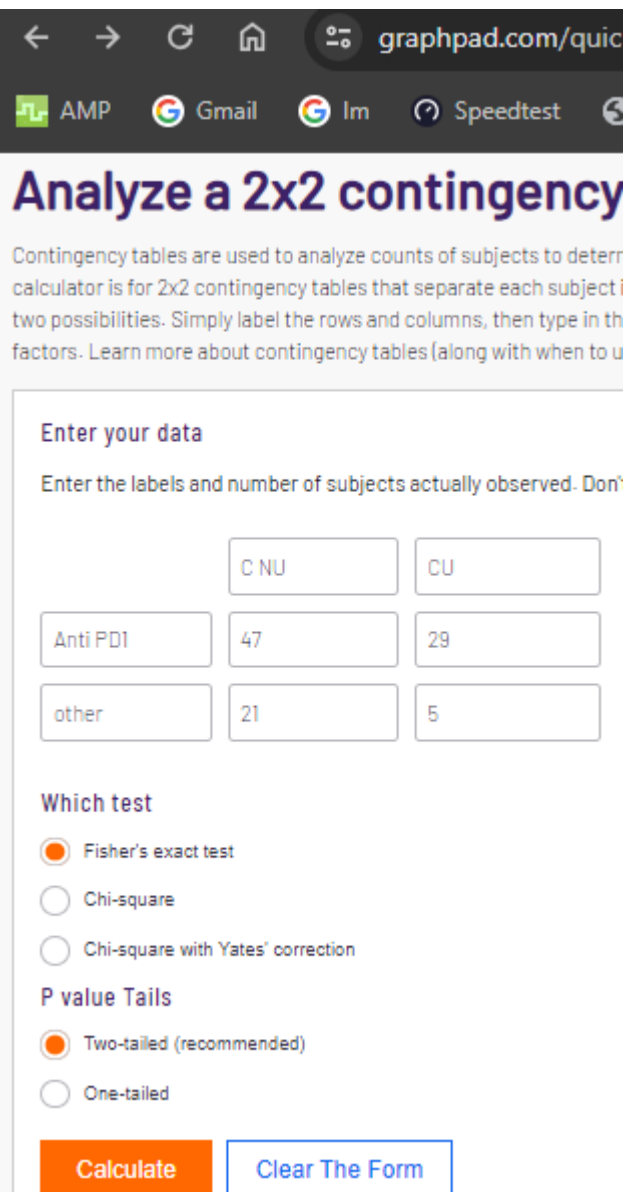

graphpad.com/quick...

### Analyze a 2x2 contingency

Contingency tables are used to analyze counts of subjects to determine if there is a significant difference between two groups. The calculator is for 2x2 contingency tables that separate each subject into two possibilities. Simply label the rows and columns, then type in the counts. Learn more about contingency tables (along with when to use them).

**Enter your data**  
Enter the labels and number of subjects actually observed. Don't use percentages.

|          | C NU | CU |
|----------|------|----|
| Anti PD1 | 47   | 29 |
| other    | 21   | 5  |

**Which test**

☒ Fisher's exact test

☐ Chi-square

☐ Chi-square with Yates' correction

**P value Tails**

☒ Two-tailed (recommended)

☐ One-tailed

**Calculate** **Clear The Form**

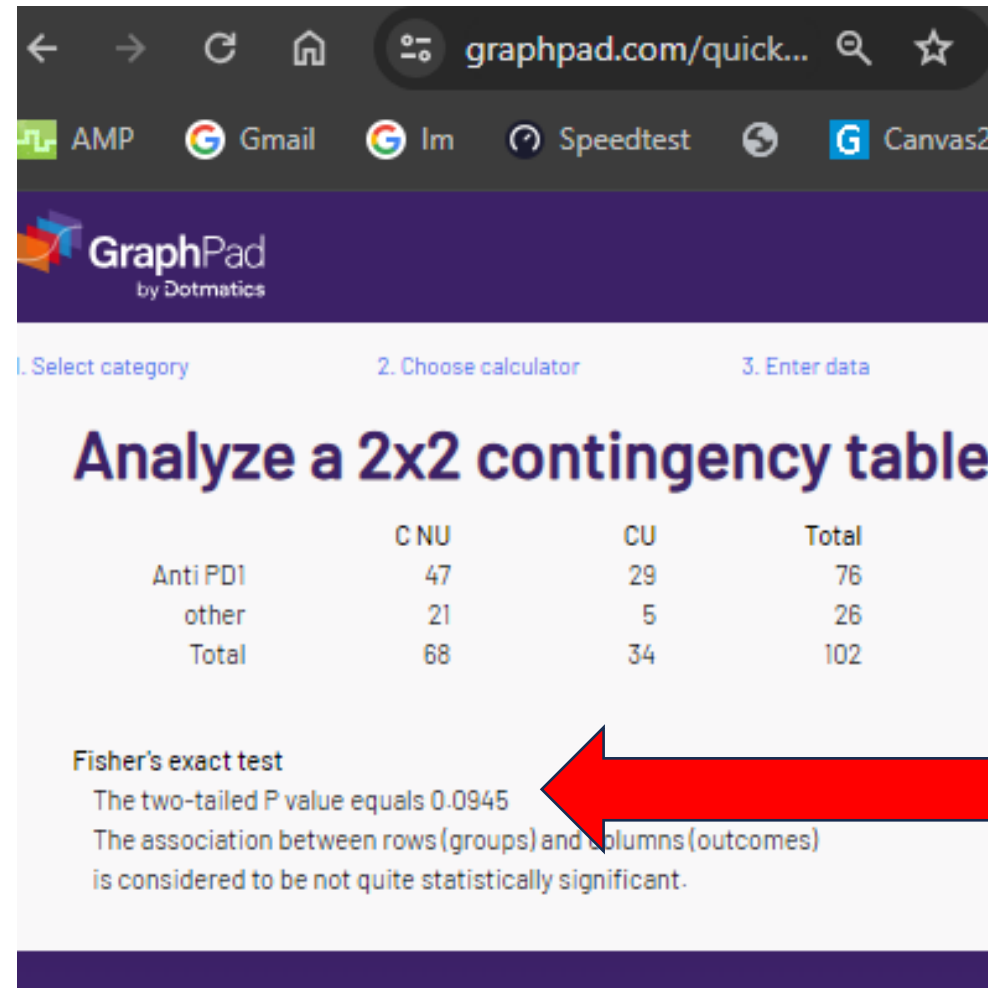

graphpad.com/quick...

### Analyze a 2x2 contingency table

|          | C NU | CU | Total |
|----------|------|----|-------|
| Anti PD1 | 47   | 29 | 76    |
| other    | 21   | 5  | 26    |
| Total    | 68   | 34 | 102   |

**Fisher's exact test**  
The two-tailed P value equals 0.0945  
The association between rows (groups) and columns (outcomes) is considered to be not quite statistically significant.

The for PD-1 immunotherapy reported p-value could not be verified with either chi-square or Fisher's. A “trend” ( $p > .05$  but  $p < .10$ ) was identified with both statistics. However, this was not discussed in the manuscript as this near significant difference could change the interpretation of this immunotherapy study.

# T. “corrected” chi-sq or Fisher’s = .127

graphpad.com/quick

AMP Gmail Im Speedtest

## Analyze a 2x2 contingency

Contingency tables are used to analyze counts of subjects to determine if there is a significant difference between two groups. Simply label the rows and columns, then type in the factors. Learn more about contingency tables (along with when to use them).

**Enter your data**

Enter the labels and number of subjects actually observed. Don't

|          | C NU | CU |
|----------|------|----|
| Anti PD1 | 47   | 29 |
| other    | 21   | 5  |

**Which test**

☐ Fisher's exact test

☐ Chi-square

☒ Chi-square with Yates' correction

**P value Tails**

☒ Two-tailed (recommended)

☐ One-tailed

**Calculate** **Clear The Form**

GraphPad  
by Dotmatics

1. Select category 2. Choose calculator 3. Enter data

## Analyze a 2x2 contingency table

|          | C NU | CU | Total |
|----------|------|----|-------|
| Anti PD1 | 47   | 29 | 76    |
| other    | 21   | 5  | 26    |
| Total    | 68   | 34 | 102   |

**Chi-square with Yates correction**

Chi squared equals 2.329 with 1 degrees of freedom.

The two-tailed P value equals 0.1270

The association between rows (groups) and columns (outcomes) is considered to be not statistically significant.

The smallest N per cell was 5 so Yates would (arguably) not be used. However, the p-value was verified (again, with a statistic not listed in the methods section).

# U. “corrected” chi-sq or Fisher’s $p = .2517$

graphpad.com/quick

1. Select category 2. Choose calculator 3. Enter data

## Analyze a 2x2 contingency

Contingency tables are used to analyze counts of subjects to determine the relationship between two variables. The calculator is for 2x2 contingency tables that separate each subject into two possibilities. Simply label the rows and columns, then type in the counts. Learn more about contingency tables (along with when to use them).

Enter your data

Enter the labels and number of subjects actually observed. Don't

|            | C NU | CU |
|------------|------|----|
| ipi & nivo | 16   | 4  |
| other      | 52   | 30 |

Which test

☐ Fisher's exact test

☒ Chi-square

☐ Chi-square with Yates' correction

P value Tails

☒ Two-tailed (recommended)

☐ One-tailed

Calculate Clear The Form

GraphPad  
by Dotmatics

1. Select category 2. Choose calculator 3. Enter data

## Analyze a 2x2 contingency table

|            | C NU | CU | Total |
|------------|------|----|-------|
| ipi & nivo | 16   | 4  | 20    |
| other      | 52   | 30 | 82    |
| Total      | 68   | 34 | 102   |

Chi-square without Yates correction

Chi squared equals 1.990 with 1 degrees of freedom.

The two-tailed P value equals 0.1583

The association between rows (groups) and columns (outcomes) is considered to be not statistically significant.

# U. “corrected” chi-sq or Fisher’s $p = .2517$

## Analyze a 2x2 contingency

Contingency tables are used to analyze counts of subjects to determine if there is a significant association between two variables. The calculator is for 2x2 contingency tables that separate each subject into two possibilities. Simply label the rows and columns, then type in the counts. Learn more about contingency tables (along with when to use them).

### Enter your data

Enter the labels and number of subjects actually observed. Don't

|            | C NU | CU |
|------------|------|----|
| ipi & nivo | 16   | 4  |
| other      | 52   | 30 |

### Which test

- ☒ Fisher's exact test
- ☐ Chi-square
- ☐ Chi-square with Yates' correction

### P value Tails

- ☒ Two-tailed (recommended)
- ☐ One-tailed

Calculate

Clear The Form

 **GraphPad**  
by Dotmatics

1. Select category2. Choose calculator3. Enter data

## Analyze a 2x2 contingency table

|            | C NU | CU | Total |
|------------|------|----|-------|
| ipi & nivo | 16   | 4  | 20    |
| other      | 52   | 30 | 82    |
| Total      | 68   | 34 | 102   |

**Fisher's exact test**

The two-tailed P value equals 0.1934

The association between rows (groups) and columns (outcomes) is considered to be not statistically significant.

The reported p value for ipilimumab & nivolumab could not be verified with either chi-square or Fisher's.



# U. “corrected” chi-sq or Fisher’s $p = .2517$

## Analyze a 2x2 contingency

Contingency tables are used to analyze counts of subjects to determine if there is a significant association between two categorical variables. A chi-square calculator is for 2x2 contingency tables that separate each subject into two possibilities. Simply label the rows and columns, then type in the counts. Learn more about contingency tables (along with when to use them).

### Enter your data

Enter the labels and number of subjects actually observed. Don't

|            |      |    |
|------------|------|----|
|            | C NU | CU |
| ipi & nivo | 16   | 4  |
| other      | 52   | 30 |

### Which test

- ☐ Fisher's exact test
- ☐ Chi-square
- ☒ Chi-square with Yates' correction

### P value Tails

- ☒ Two-tailed (recommended)
- ☐ One-tailed

Calculate

Clear The Form

graphpad.com/quick...

AMP Gmail Im Speedtest Canvas2

GraphPad by Dotmatics

1. Select category 2. Choose calculator 3. Enter data

## Analyze a 2x2 contingency table

|            | C NU | CU | Total |
|------------|------|----|-------|
| ipi & nivo | 16   | 4  | 20    |
| other      | 52   | 30 | 82    |
| Total      | 68   | 34 | 102   |

Chi-square with Yates correction

Chi squared equals 1.314 with 1 degrees of freedom

The two-tailed P value equals 0.2517

The association between rows (groups) and columns (variables) is considered to be not statistically significant



Although not listed in the methods section, due to the small N per cell (4), Yates correction would be appropriate here. The p value is verified.

# V. “Corrected” chi-sq or Fisher’s $p = “1”$

1. Select category 2. Choose calculator 3. Enter data

## Analyze a 2x2 contingency

Contingency tables are used to analyze counts of subjects to determine if there is a significant difference between two groups. Simply label the rows and columns, then type in the counts. Learn more about contingency tables (along with when to use them).

Enter your data

Enter the labels and number of subjects actually observed. Don't use percentages.

|            | C NU | CU |
|------------|------|----|
| anti PDL-1 | 5    | 1  |
| other      | 63   | 33 |

Which test

☐ Fisher's exact test

☒ Chi-square

☐ Chi-square with Yates' correction

P value Tails

☒ Two-tailed (recommended)

☐ One-tailed

[Calculate](#) [Clear The Form](#)

1. Select category 2. Choose calculator 3. Enter data

## Analyze a 2x2 contingency table

|            | C NU | CU | Total |
|------------|------|----|-------|
| anti PDL-1 | 5    | 1  | 6     |
| other      | 63   | 33 | 96    |
| Total      | 68   | 34 | 102   |

Chi-square without Yates correction

Chi squared equals 0.797 with 1 degrees of freedom.

The two-tailed P value equals 0.3720

The association between rows (groups) and columns (outcomes) is considered to be not statistically significant.

Note that a statistician that has worked with non-parametric data could just eyeball this data and intuitively know that the p value was **not** 1.000. That only happens when the % is equal for both groups. With 5 for 68 total in the CNU group, it would have to be 2.5 (i.e. half) per 34 total in the CU group. As this is an impossible outcome, there is clearly an error in the reporting for this immunotherapy variable.

# V. “Corrected” chi-sq or Fisher’s $p = “1”$

graphpad.com/quick

AMP Gmail Im Speedtest

1. Select category 2. Choose calculator 3. Enter data

## Analyze a 2x2 contingency

Contingency tables are used to analyze counts of subjects to determine the relationship between two categorical variables. The calculator is for 2x2 contingency tables that separate each subject in two possibilities. Simply label the rows and columns, then type in the factors. Learn more about contingency tables (along with when to use them).

Enter your data

Enter the labels and number of subjects actually observed. Don't enter percentages.

|            | C NU | CU |
|------------|------|----|
| anti PDL-1 | 5    | 1  |
| other      | 63   | 33 |

Which test

☒ Fisher's exact test

☐ Chi-square

☐ Chi-square with Yates' correction

P value Tails

☒ Two-tailed (recommended)

☐ One-tailed

Calculate Clear The Form

Select category 2. Choose calculator 3. Enter data

## Analyze a 2x2 contingency table

|            | C NU | CU | Total |
|------------|------|----|-------|
| anti PDL-1 | 5    | 1  | 6     |
| other      | 63   | 33 | 96    |
| Total      | 68   | 34 | 102   |

**Fisher's exact test**

The two-tailed P value equals 0.6607

The association between rows (groups) and columns (outcomes) is considered to be not statistically significant.

The “corrected”  $p$  value for anti-PDL-1 immunotherapy could **not** be verified with either chi-square or Fisher’s.

# V. “Corrected” chi-sq or Fisher’s $p = “1”$

graphpad.com/quick...

AMP Gmail Im Speedtest

1. Select category 2. Choose calculator 3. Enter data

## Analyze a 2x2 contingency table

Contingency tables are used to analyze counts of subjects to determine if there is a significant association between two variables. The calculator is for 2x2 contingency tables that separate each subject into two possibilities. Simply label the rows and columns, then type in the counts. Learn more about contingency tables (along with when to use them).

**Enter your data**

Enter the labels and number of subjects actually observed. Don't enter percentages.

|            | C NU | CU |
|------------|------|----|
| anti PDL-1 | 5    | 1  |
| other      | 63   | 33 |

**Which test**

☐ Fisher's exact test

☐ Chi-square

☒ Chi-square with Yates' correction

**P value Tails**

☒ Two-tailed (recommended)

☐ One-tailed

**Calculate** **Clear The Form**

GraphPad  
by Dotmatics

1. Select category 2. Choose calculator 3. Enter data

## Analyze a 2x2 contingency table

|            | C NU | CU | Total |
|------------|------|----|-------|
| anti PDL-1 | 5    | 1  | 6     |
| other      | 63   | 33 | 96    |
| Total      | 68   | 34 | 102   |

**Chi-square with Yates correction**

Chi squared equals 0.199 with 1 degrees of freedom

The two-tailed P value equals 0.6554

The association between rows (groups) and columns (variables) is considered to be not statistically significant.

The reported p-value also was **not** verified with Yates.

# For further information

These concerns are also described at: [https://pubpeer.com/publications/5AFA302155D8AE02603134F556A085?utm\\_source=Chrome&utm\\_medium=BrowserExtension&utm\\_campaign=Chrome](https://pubpeer.com/publications/5AFA302155D8AE02603134F556A085?utm_source=Chrome&utm_medium=BrowserExtension&utm_campaign=Chrome)

1.2  
A series of  $\chi^2$  tests or Fisher's exact tests (when the assumptions of the parametric  $\chi^2$  test were not met) and nonparametric Mann–Whitney U tests were conducted to analyze the differences between patients' characteristics in both groups. Time to tumor progression (TTP) and overall survival (OS) was estimated using the Kaplan-Meier survival curve by group, and the log-rank test was computed to differentiate the survival curves between groups. Hazard ratios and the corresponding 95% CIs based on a Cox proportional hazards regression model were provided for multivariate analyses. We computed 2-tailed  $p$ -values, where  $p < 0.05$  was considered a statistically significant result. Statistical analyses were performed using the SAS software package version 9.4 (SAS Institute, Cary, NC, USA).

## Note 2-tailed p values

Parametric: variables with normal distribution were compared by means of parametric tests, there is no such thing as a “parametric chi-square test”

# Summary of Table 2

- 0 of the 2 p values could be replicated despite trying 6 different ways
- 2 of the 12 percentage calculations contain rounding errors

Table 2. Abnormal laboratory tests before immunotherapy (according to local normal ranges).

| Test           |                                         | Cannabis:<br>Nonusers<br><i>n</i> = 68 | Cannabis:<br>Users<br><i>n</i> = 34 | <i>p</i> -Value | Two-tailed<br>Ch-sq=.1199<br>F=.1412<br>Y=.1793<br>Ch-sq=.4590 |
|----------------|-----------------------------------------|----------------------------------------|-------------------------------------|-----------------|----------------------------------------------------------------|
| 1              | Lymphocytes ≤ 1.5 K/uL—N (%)            | 35 (51)                                | 23 (67) 67.6=68                     | 0.08            |                                                                |
|                | Blood count WBC ≤ 4.5 K/uL—N (%)        | 7 (10)                                 | 2 (6)                               | -               |                                                                |
| Liver Function |                                         |                                        |                                     |                 |                                                                |
| 2              | Alanine Aminotransferase (ALT) > 45     | 7 (10)                                 | 3 (9)                               | -               | Chi-sq=.1374<br>F=.1468<br>Y=.2157                             |
|                | Aspartate Aminotrasferase (AST) > 35    | 8 (12)                                 | 5 (15)                              | -               |                                                                |
|                | Alkaline phosphatase level (ALKP) > 120 | 13 (19)                                | 11 (32)                             | 0.09            |                                                                |
|                | Renal Function—N (%)                    |                                        |                                     |                 |                                                                |
|                | Creatinine > 1.17 mL/min                | 12 (17) 17.6 = 18                      | 3 (9)                               | -               |                                                                |

One-tailed

1: C = .060, F = .0890, Y = .0896, 3: C= .0687, F = .1089, Y = .1079



## Analyze a 2x2 Contingency

Contingency tables are used to analyze counts of subjects to determine if there is a significant association between two categorical variables. The calculator is for 2x2 contingency tables that separate each subject into two categories with two possibilities. Simply label the rows and columns, then type in the counts between the two factors. Learn more about contingency tables (also called chi-square tests) and the calculator.

### Enter your data

Enter the labels and number of subjects actually observed. Don't

|         | CNU | CU |
|---------|-----|----|
| L ≤ 1.5 | 35  | 23 |
| L > 1.5 | 33  | 11 |

### Which test

- ☐ Fisher's exact test
- ☐ Chi-square
- ☒ Chi-square with Yates' correction

### P value Tails

- ☒ Two-tailed (recommended)
- ☐ One-tailed

Calculate

Clear The Form

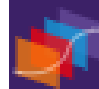

GraphPad  
by Dotmatics

Prism

Customers

Resources

Support

Pricing

1. Select category

2. Choose calculator

3. Enter data

## Analyze a 2x2 contingency table

|         | CNU | CU | Total |
|---------|-----|----|-------|
| L ≤ 1.5 | 35  | 23 | 58    |
| L > 1.5 | 33  | 11 | 44    |
| Total   | 68  | 34 | 102   |

### Chi-square with Yates correction

Chi squared equals 1.804 with 1 degrees of freedom.

The two-tailed P value equals 0.1793

The association between rows (groups) and columns (outcomes) is considered to be not statistically significant.

## Analyze a 2x2 contingency

Contingency tables are used to analyze counts of subjects to determine if there is a significant association between two variables. The calculator is for 2x2 contingency tables that separate each subject into one of two categories with two possibilities. Simply label the rows and columns, then type in the counts between the two factors. Learn more about contingency tables (also called chi-square tests) using the calculator.

### Enter your data

Enter the labels and number of subjects actually observed. Don't

|         |     |    |
|---------|-----|----|
|         | CNU | CU |
| L ≤ 1.5 | 35  | 23 |
| L > 1.5 | 33  | 11 |

### Which test

- ☐ Fisher's exact test
- ☒ Chi-square
- ☐ Chi-square with Yates' correction

### P value Tails

- ☒ Two-tailed (recommended)
- ☐ One-tailed

Calculate

Clear The Form

1. Select category

2. Choose calculator

3. Enter data

## Analyze a 2x2 contingency table

|         | CNU | CU | Total |
|---------|-----|----|-------|
| L ≤ 1.5 | 35  | 23 | 58    |
| L > 1.5 | 33  | 11 | 44    |
| Total   | 68  | 34 | 102   |

### Chi-square without Yates correction

Chi squared equals 2.418 with 1 degree of freedom.

The two-tailed P value equals 0.1199

The association between rows (groups) and columns (outcomes) is considered to be not statistically significant.

# Analyze a 2x2 contingency

Contingency tables are used to analyze counts of subjects to determine if there is a significant association between two factors. The calculator is for 2x2 contingency tables that separate each subject into two possibilities. Simply label the rows and columns, then enter the counts for each combination of the two factors. Learn more about contingency tables and the calculator.

## Enter your data

Enter the labels and number of subjects actually observed. Labels should be entered in the first column.

|         | CNU | CU |
|---------|-----|----|
| L <=1.5 | 35  | 23 |
| L>1.5   | 33  | 11 |

## Which test

- ☒ Fisher's exact test
- ☐ Chi-square
- ☐ Chi-square with Yates' correction

## P value Tails

- ☒ Two-tailed (recommended)
- ☐ One-tailed

Calculate

Clear The Form

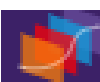

GraphPad  
by Dotmatics

Prism Customers Resources Support Pricing

1. Select category

2. Choose calculator

3. Enter data

# Analyze a 2x2 contingency table

|         | CNU | CU | Total |
|---------|-----|----|-------|
| L <=1.5 | 35  | 23 | 58    |
| L>1.5   | 33  | 11 | 44    |
| Total   | 68  | 34 | 102   |

## Fisher's exact test

The two-tailed P value equals 0.1412

The association between rows (groups) and columns (outcomes) is considered to be not statistically significant.

# Analyze a 2x2 contingency

Contingency tables are used to analyze counts of subjects to determine if there is a significant association between two variables. This calculator is for 2x2 contingency tables that separate each subject into two possibilities. Simply label the rows and columns, then type in the counts for the two factors. Learn more about contingency tables (along with when to use them).

## Enter your data

Enter the labels and number of subjects actually observed. Don't enter percentages.

|       | CNU | CU |
|-------|-----|----|
| L≤1.5 | 35  | 23 |
| L>1.5 | 33  | 11 |

## Which test

- ☐ Fisher's exact test
- ☐ Chi-square
- ☒ Chi-square with Yates' correction

## P value Tails

- ☐ Two-tailed (recommended)
- ☒ One-tailed

Calculate

Clear The Form

Pad  
matics

Prism

Customers

Resources

Support

1. Select category

2. Choose calculator

3. Enter data

# Analyze a 2x2 contingency table

|       | CNU | CU | Total |
|-------|-----|----|-------|
| L≤1.5 | 35  | 23 | 58    |
| L>1.5 | 33  | 11 | 44    |
| Total | 68  | 34 | 102   |

## Chi-square with Yates correction

Chi squared equals 1.804 with 1 degrees of freedom.

The one-tailed P value equals 0.0896

The association between rows (groups) and columns (outcomes) is considered to be not quite statistically significant.

This p value almost corresponds with that reported in Table 2.

# Analyze a 2x2 contingency table

Contingency tables are used to analyze counts of subjects to determine if there is association between two factors. The calculator is for 2x2 contingency tables that separate each subject into one of four categories with two possibilities. Simply label the rows and columns, then type in the counts for each combination between the two factors. Learn more about contingency tables (along with when to use the calculator).

## Enter your data

Enter the labels and number of subjects actually observed. Don't enter proportions.

|            | CNU | CU |
|------------|-----|----|
| ALKP > 120 | 13  | 11 |
| ALKP ≤ 120 | 55  | 23 |

## Which test

- ☐ Fisher's exact test
- ☐ Chi-square
- ☒ Chi-square with Yates' correction

## P value Tails

- ☐ Two-tailed (recommended)
- ☒ One-tailed

Calculate

Clear The Form

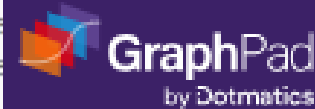

[Prism](#) [Customers](#) [Resources](#) [Support](#) [Pricing](#)

1. Select category

2. Choose calculator

3. Enter data

# Analyze a 2x2 contingency table

|            | CNU | CU | Total |
|------------|-----|----|-------|
| ALKP > 120 | 13  | 11 | 24    |
| ALKP ≤ 120 | 55  | 23 | 78    |
| Total      | 68  | 34 | 102   |

## Chi-square with Yates correction

Chi squared equals 1.532 with 1 degrees of freedom.

The one-tailed P value equals 0.1079

The association between rows (groups) and columns (outcomes) is considered to be not statistically significant.

## Analyze a 2x2 Contingency

Contingency tables are used to analyze counts of subjects to factors. This calculator is for 2x2 contingency tables that are based on two factors, each with two possibilities. Simply label the rows and columns (or each cell to test the relationship between the two factors; when to use each test) in the description below the calculator.

### Enter your data

Enter the labels and number of subjects actually observed in each cell.

|          |     |    |
|----------|-----|----|
|          | CNU | CU |
| WBC<=4.5 | 7   | 2  |
| WBC>4.5  | 61  | 32 |

### Which test

- ☐ Fisher's exact test
- ☒ Chi-square
- ☐ Chi-square with Yates' correction

### P value Tails

- ☒ Two-tailed (recommended)
- ☐ One-tailed

Calculate

Clear The Form

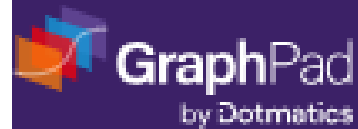

1. Select category

2. Choose calculator

3. Enter data

4. View results

## Analyze a 2x2 contingency table

|          |     |    |       |
|----------|-----|----|-------|
|          | CNU | CU | Total |
| WBC<=4.5 | 7   | 2  | 9     |
| WBC>4.5  | 61  | 32 | 93    |
| Total    | 68  | 34 | 102   |

### Chi-square without Yates correction

Chi squared equals 0.548 with 1 degrees of freedom.

The two-tailed P value equals 0.4590

The association between rows (groups) and columns (outcomes) is considered to be not statistically significant.

# Analyze a 2x2 contingency

Contingency tables are used to analyze counts of subjects to de factors. This calculator is for 2x2 contingency tables that separ based on two factors, each with two possibilities. Simply label t or each cell to test the relationship between the two factors. L when to use each test) in the description below the calculator.

## Enter your data

Enter the labels and number of subjects actually observed. I means.

|           |     |    |
|-----------|-----|----|
|           | CNU | CU |
| ALKP>120  | 13  | 11 |
| ALKP<=120 | 55  | 23 |

## Which test

- ☐ Fisher's exact test
- ☒ Chi-square
- ☐ Chi-square with Yates' correction

## P value Tails

- ☒ Two-tailed (recommended)
- ☐ One-tailed

Calculate

Clear The Form



GraphPad  
by Dotmatics

1. Select category

2. Choose calculator

3. Enter data

4. View results

# Analyze a 2x2 contingency table

|           |     |    |       |
|-----------|-----|----|-------|
|           | CNU | CU | Total |
| ALKP>120  | 13  | 11 | 24    |
| ALKP<=120 | 55  | 23 | 78    |
| Total     | 68  | 34 | 102   |

## Chi-square without Yates correction

Chi squared equals 2.207 with 1 degrees of freedom.

The two-tailed P value equals 0.1374

The association between rows (groups) and columns (outcomes) is considered to be not statistically significant.

# Analyze a 2x2 contingency

Contingency tables are used to analyze counts of subjects to factors. This calculator is for 2x2 contingency tables that separate based on two factors, each with two possibilities. Simply label for each cell to test the relationship between the two factors. (when to use each test) in the description below the calculator.

## Enter your data

Enter the labels and number of subjects actually observed means.

|           |     |    |
|-----------|-----|----|
|           | CNU | CU |
| ALKP>120  | 13  | 11 |
| ALKP<=120 | 55  | 23 |

## Which test

- ☒ Fisher's exact test
- ☐ Chi-square
- ☐ Chi-square with Yates' correction

## P value Tails

- ☒ Two-tailed (recommended)
- ☐ One-tailed

Calculate

Clear The Form

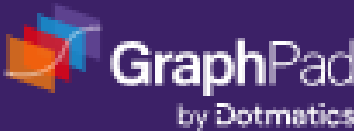

1. Select category 2. Choose calculator 3. Enter data

# Analyze a 2x2 contingency table

|           |     |    |       |
|-----------|-----|----|-------|
|           | CNU | CU | Total |
| ALKP>120  | 13  | 11 | 24    |
| ALKP<=120 | 55  | 23 | 78    |
| Total     | 68  | 34 | 102   |

## Fisher's exact test

The two-tailed P value equals 0.1468

The association between rows (groups) and columns (outcomes) is considered to be not statistically significant.



# Analyze a 2x2 contingency table

Contingency tables are used to analyze counts of subjects to determine if there is association. This calculator is for 2x2 contingency tables that separate each subject into one of four categories. Simply label the rows and columns, then type in the counts for each cell of the two factors. Learn more about contingency tables (along with when to use each test) in the help section.

## Enter your data

Enter the labels and number of subjects actually observed. Don't enter proportions, percentages, or ratios.

|           | CNU | CU |
|-----------|-----|----|
| ALKP>120  | 13  | 11 |
| ALKP<=120 | 55  | 23 |

## Which test

- ☐ Fisher's exact test
- ☐ Chi-square
- ☒ Chi-square with Yates' correction

## P value Tails

- ☒ Two-tailed (recommended)
- ☐ One-tailed

Calculate

Clear The Form

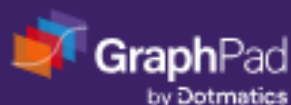

[Prism](#) [Customers](#) [Resources](#) [Support](#)

1. Select category

2. Choose calculator

3. Enter data

# Analyze a 2x2 contingency table

|           | CNU | CU | Total |
|-----------|-----|----|-------|
| ALKP>120  | 13  | 11 | 24    |
| ALKP<=120 | 55  | 23 | 78    |
| Total     | 68  | 34 | 102   |

## Chi-square with Yates correction

Chi squared equals 1.532 with 1 degrees of freedom.

The two-tailed P value equals 0.2157

The association between rows (groups) and columns (outcomes) is considered to be not statistically significant.
